1 **Modeling genotype × environment interaction for single- and multi-trait**  
2 **genomic prediction in potato (*Solanum tuberosum* L.)**

3

4 Jaime Cuevas,<sup>1</sup> Fredrik Reslow,<sup>2</sup> Jose Crossa,<sup>3,4</sup> and Rodomiro Ortiz<sup>2,\*</sup>

5

6 <sup>1</sup> Universidad Autónoma de Quintana Roo, Chetumal, Quintana Roo 77019, México

7 <sup>2</sup> Department of Plant Breeding, Swedish University of Agricultural Sciences (SLU), P.O.

8 Box 190, Lomma SE 23436, Sweden

9 <sup>3</sup> International Maize and Wheat Improvement Center (CIMMYT), Carretera México-

10 Veracruz Km. 45, El Batán, Texcoco 56237, Edo. de Mexico, Mexico

11 <sup>4</sup> Colegio de Postgraduados, Montecillos, Edo. de México 56230, México

12

13 \*Corresponding author: Rodomiro Ortiz E-mail: [rodomiro.ortiz@slu.se](mailto:rodomiro.ortiz@slu.se)

14

15 **Short running title:** Single and multi-trait genomic prediction in potato

16

17 **ABSTRACT**

18 In this study we extend research on genomic prediction (GP) to polysomic polyploid plant  
19 species with the main objective to investigate single trait (ST) versus multi-trait (MT) for  
20 multi-environment (ME) models for the combination of three locations in Sweden  
21 (Helgegården [HEL], Mosslunda [MOS], Umeå [UM]) over two year-trials (2020, 2021) of  
22 253 potato cultivars and breeding clones for five tuber weight traits and two tuber flesh  
23 quality characteristics. This research investigated the GP of four genome-based prediction  
24 models with genotype × environment interactions (GE): (1) single trait reaction norm model  
25 (*M1*), (2) single trait model considering covariances between environments (*M2*), (3) single  
26 trait *M2* extended to include a random vector that utilizes the environmental covariances  
27 (*M3*) and (4) multi-trait model with GE (*M4*). Several prediction problems were analyzed  
28 for each of the GP accuracy of the four models. Results of the prediction of traits in HEL,  
29 the high yield potential testing site in 2021, show that the best predicted traits were tuber  
30 flesh starch (%), weight of tuber above 60 or below 40 mm in size, and total tuber weight.  
31 In terms of GP, accuracy model *M4* gave the best prediction accuracy in three traits,

32 namely tuber weight of 40–50 or above 60 mm in size, and total tuber weight and very  
33 similar in the starch trait. For MOS in 2021, the best predictive traits were starch, weight of  
34 tuber above 60, 50–60, or below 40 mm in size, and total tuber weight. MT model *M4* was  
35 the best GP model based on its accuracy when some cultivars are observed in some traits.  
36 For GP accuracy of traits in UM in 2021, the best predictive traits were weight of tuber  
37 above 60, 50–60, or below 40 mm in size and the best model was MT *M4* followed by  
38 models ST *M3* and *M2*.

39

40 **Key words:** *Solanum tuberosum*, genomic prediction in potato; genomic × environment  
41 interaction; multi–environment modeling, multiple trait modeling, single–environment  
42 modeling; single trait modeling.

43

## 44 **1. INTRODUCTION**

45 Genomic prediction (GP) and selection (GS) have changed the paradigm of plant and  
46 animal breeding (Meuwissen et al., 2001; de los Campos et al., 2009; Crossa et al., 2010,  
47 2011, Desta and Ortiz, 2014). Practical evidence has shown that GS provides important  
48 increases in prediction accuracy for genomic-aided breeding (Crossa et al., 2014, 2017;  
49 Pérez-Rodríguez et al., 2012). Additive genetic effects (breeding values) can be predicted  
50 directly from parametric and semi-parametric statistical models using marker effects like  
51 the ridge regression best linear unbiased prediction (rrBLUP) (Endelman, 2011), or by  
52 developing the genomic relationship linear kernel matrix ( $\mathbf{G}$ ) to fit the genomic best linear  
53 unbiased prediction [GBLUP] (VanRaden, 2008). Departures from linearity can be assessed  
54 by semi-parametric approaches, such as Reproducing Kernel Hilbert Space (RKHS)  
55 regression using the Gaussian kernel or different types of neural networks (Gianola et al.,  
56 2006; Gianola and van Kaam, 2008; de los Campos et al., 2010; González-Camacho et al.,  
57 2012; Pérez-Rodríguez et al., 2012, Gianola et al., 2014; Sousa et al., 2017).

58 Standard GP models were extended to multi-environments by assessing genomic ×  
59 environment interaction (GE) (Burgueño et al., 2012). Jarquín et al. (2014) proposed an  
60 extension of the GBLUP or random effects model where the main effects of markers and  
61 environmental covariates could be introduced using covariance structures that are functions  
62 of marker genotypes and environments. Consistently, GP accuracy substantially increased

63 when incorporating GE and marker  $\times$  environment interaction (Cossa et al., 2017). Cuevas  
64 et al. (2016) and Souza et al. (2017) applied the marker  $\times$  environment interaction GS  
65 model of Lopez-Cruz et al. (2015) but modeled not only through the standard GBLUP but  
66 also through a non-linear Gaussian kernel (GK) like that used by de los Campos et al.  
67 (2010) and a GK with the bandwidth estimated through an empirical Bayesian method  
68 (Pérez-Elizalde et al., 2015). Cuevas et al. (2016) concluded that the higher prediction  
69 accuracy of the GK models with the GE model is due to more flexible kernels that allow  
70 accounting for small, more complex marker main effects and marker-specific interaction  
71 effects.

72 In GP the training set usually includes a sufficient overlap of lines across  
73 environments, so that estimating the phenotypic covariance among environments for  
74 modeling GE is sufficient to specify it on the linear mixed model used. When modeling  
75 GE, some researchers used the mathematical operation defined by the Kronecker products  
76 or direct product (Cuevas et al., 2016) that allows operations of two matrices of different  
77 dimensions. Other authors model GE using the matrix operation named Hadamard products  
78 (also known as element-wise products) that is a binary operation between two matrices of  
79 the same dimensions as the operands (Jarquin et al., 2014; Lopez-Cruz et al., 2015; Perez-  
80 Rodriguez et al., 2015; Acosta-Pech et al., 2017; Perez-Rodriguez et al., 2017; Sukumaran  
81 et al. 2017; Basnet et al., 2019). When modeling epistasis, Hadamard products of the  
82 additive genomic relationship have mainly been used (e.g., Jiang and Reif, 2015; Martini et  
83 al., 2016; Vitezica et al., 2017; Varona et al., 2018; Martini et al., 2020). However, Cossa  
84 et al. (2006) and Burgueño et al. (2007) have used Kronecker products for modeling and  
85 estimation of additive, additive  $\times$  environment interaction, additive  $\times$  additive epistasis, and  
86 additive  $\times$  additive  $\times$  environment interactions by means of the coefficient of parentage. In  
87 a recent study, Martini et al. (2020) gave theoretical proof that both methods lead to the  
88 same covariance model when used with some specific design matrices and illustrated how  
89 to explicitly model the interaction between markers, temperature, or precipitation.

90 Traditionally GP models have evolved from the single trait (ST) and single  
91 environment prediction (ST-SE) models to ST multiple environment (ST-ME) models  
92 including GE. Furthermore, standard GS-assisted plant breeding models are concerned with  
93 the assessment of the GP accuracy of a multi-trait (MT) measured in a single environment

94 (MT-SE) or MT multiple environments (MT-ME). In general, multi-traits (MT) GP models  
95 have evolved from MT-SE to MT-ME. The MT models are key for improving prediction  
96 accuracy in GS because MT models offer benefits regarding ST models when the traits  
97 under study are correlated. Most existing models for genomic prediction are ST models  
98 although MT models have several advantages over the ST (Montesinos et al., 2019).  
99 Compared with ST, MT can simultaneously exploit the correlation between cultivar and  
100 traits and thus improve the accuracy of GP as they are computationally more efficient than  
101 ST (Montesinos-López et al., 2019). When the traits are correlated, MT models improve  
102 parameter estimates and prediction accuracy as compared to ST models (Schulthess et al.  
103 2018; Calus and Veerkamp, 2011, Jiang and Jannink, 2012, Montesinos-López et al., 2016,  
104 2019; He et al., 2016). With the continuous growth of computational power, MT models  
105 play an increasingly important role in data analysis in plant and animal genomic-aided  
106 breeding for selecting the best candidate genotypes.

107         The use of MT models is not as widespread as the use of ST models because several  
108 factors such as, among others, lack of efficient and friendly software, and not enough  
109 computational resources; also, MT models have more complex genotype  $\times$  environment  
110 interactions (GE) that make it difficult to assess and achieve MT model assumptions, and  
111 MT models have more problems of convergence than ST models. Some models have been  
112 proposed for MT GP, e.g., multi-trait mixed models and their Bayesian version, Bayesian  
113 multi-trait genomic best linear unbiased predictor and multi-trait models under artificial  
114 deep neural networks applied to maize and wheat datasets (Montesinos-López et al., 2018,  
115 2019). However, most researchers use MT models to improve prediction accuracy for traits  
116 to be predicted (i.e., the prediction set) –which are tedious and time-consuming to measure  
117 and have low heritability– by using a few traits (i.e., the training set) with high heritability  
118 that are highly correlated with the former prediction set (Semagn et al., 2022; Jiang and  
119 Jannink, 2012).

120         It is widely recognized that from the statistical and quantitative genetics  
121 perspectives, when data on multi-traits are available, the preferred models are the MT as  
122 they can account for correlations between phenotypic traits in the training set because  
123 borrowing information from correlated traits increases GP accuracy. Montesinos et al.  
124 (2022) investigated Bayesian multi-trait kernel methods for GP and illustrated the power of

125 linear, Gaussian, polynomial, and sigmoid kernels. The authors compared these kernels  
126 with the conventional ridge regression and GBLUP multi-trait models. Montesinos et al.  
127 (2022) showed that, in general, but not always, the GK method outperformed conventional  
128 Bayesian ridge and GBLUP multi-trait in terms of GP prediction performance; the authors  
129 concluded that the improvement in terms of prediction performance of the Bayesian multi-  
130 trait kernel method can be attributed to the proposed model being able to capture nonlinear  
131 patterns more efficiently than linear multi-trait models.

132 Semagn et al. (2022) were interested in comparing prediction accuracy estimates of  
133 a subset of lines that have been tested for a single trait (ST), with a subset of lines that have  
134 not been tested for certain proportion traits (MT1, certain cultivars were not tested for any  
135 of the traits), and a subset of lines that have been tested for some traits but not for other  
136 traits (MT2) across different bread wheat genetic backgrounds for agronomic traits of  
137 varying genetic architecture evaluated under conventional and organic management  
138 systems, and several host plant resistance traits evaluated in adult plants under standard  
139 field management. Their results show that the predictive ability of the MT2 model was  
140 significantly greater than that of the ST and MT1 models for most of the traits and  
141 populations, except common bunt, with the MT1 model being intermediate between them,  
142 demonstrating the high potential of the multi-trait models in improving prediction accuracy.

143 Although most GP research for ST and MT for SE or ME has been applied to  
144 diploid species, a recent study by Ortiz et al. (2022) demonstrated the increase in prediction  
145 accuracy of ST-ME over the ST-SE genomic-estimated breeding values for several  
146 tetrasomic potato (*Solanum tuberosum* L.) breeding clones and released cultivars for  
147 various traits evaluated in several sites for one year. Ortiz et al. (2022) considered four  
148 dosages of marker alleles (A) pseudo-diploid; (B) additive tetrasomic polyploidy, and (C)  
149 additive-non-additive tetrasomic polyploidy, and B+C dosages together in the genome-  
150 based prediction models using the conventional linear GBLUP (GB) and the non-linear  
151 Gaussian kernel (GK) for ST-SE and ST-ME together. Results show that GK did not show  
152 any clear advantage over GB, and ST-ME had prediction accuracy estimates higher than  
153 those obtained from ST-SE. The model with GB was the best method in combination with  
154 the marker structures C or B+C for predicting most of the tuber traits. Most of the traits

155 gave relatively high prediction accuracy under this combination of marker structure C or  
156 (B+C) and methods GB and GK combined with the ST-ME including GE model.

157         Based on the above considerations, and the need to extend research on GP to  
158 polysomic polyploid plant species, the main objectives of this research were to investigate  
159 ST versus MT for ME (GE) models for the combination of three locations (namely  
160 Helgegården [HEL], Mosslunda [MOS], and Umeå [UM]) over two years (2020, 2021) of  
161 253 potato cultivars and breeding clones, which were also included by Ortiz et al. (2022).  
162 In this study we will use only the genomic relationship matrix obtained from the additive-  
163 non-additive tetrasomic polyploidy (C) because using this genomic relations matrix in  
164 terms of GP accuracy was found to be one with the best GP accuracy (Ortiz et al., 2022).  
165 This research investigated the GP of four genome-based prediction models including either  
166 Hadamard or Kronecker product matrices for assessing GE: (1) the conventional reaction  
167 norm model incorporating GE with Hadamard product (Jarquin et al., 2014) (*M1*), (2) GE  
168 model considering covariances between environments, similar to the model employed by  
169 Burgueño et al. (2012) or the GE with Kronecker product (*M2*), (3) GE model 2 including a  
170 random vector that attempts to more efficiently utilize the environmental covariances as in  
171 Cuevas et al. (2017) or a GE with Kronecker product (*M3*), and (4) a multi-trait model with  
172 GE as in Montesinos et al. (2022) but including a GE model that joins Hadamard and  
173 Kronecker products (*M4*). Several prediction problems were analyzed for the GP accuracy  
174 of each of the four models. We investigated the prediction set of locations in year 2021  
175 from locations in year 2020 using the four GP models combined with two of the prediction  
176 sets (100% and 70%) and predicting ST and MT.

177

## 178 **2. MATERIALS AND METHODS**

### 179 **2.1 Phenotypic data**

180 The multi-site experiments included 253 potato breeding clones and cultivars in trials at  
181 Helgegården (HEL), Mosslunda (MOS) and Umeå (UM). Their list is provided by Ortiz et  
182 al. (2022) **Supplementary Table S1** (<https://hdl.handle.net/11529/10548617>). The  
183 breeding clones are in at least the fourth generation ( $T_4$ ) of selection by Svensk  
184 potatisförädling of the Swedish University of Agricultural Sciences (Ortiz et al., 2020),  
185 while the cultivars are a sample of those released and grown in Europe during the last 200

186 years. Hellegården and Mosslunda are near Kristianstad (56°01'46"N 14°09'24"E, Skåne,  
187 southern Sweden), while Umeå (63°49'30"N 20°15'50"E) is in the north of Sweden.

188 An incomplete block design (simple lattice) with two replications of 10 plants each  
189 was the field layout for the field trials across testing sites. Fungicides were only used in  
190 Hellegården to avoid late blight caused by the oomycete *Phytophthora infestans*  
191 throughout the growing season, thus allowing tuber yield potential to be estimated at this  
192 site. Crop husbandry was that used for potato farming at each site.

193 Total tuber yield per plot (kg), tuber weight by size (< 40 mm, 40–50 mm, 50–60  
194 mm, > 60 mm; kg), while tuber flesh starch was measured as percentage based on specific  
195 gravity after harvest. Reducing sugars in the tuber flesh after harvest was determined using  
196 potato glucose strip tests (Mann et al., 1991). Host plant resistance to late blight was  
197 evaluated using the area under the disease progress curve (AUDPC) in Mosslunda.

198

## 199 **2.2 Genotypic data**

200 After sampling using four leaf punches for each of the 256 breeding clones and  
201 cultivars included in the experiments, the materials were sent by AgriTech – Intertek  
202 ScanBi Diagnostics (Alnarp, Sweden) to Diversity Array Technology Pty Ltd (ACT,  
203 Australia) for targeted genotyping following a genotype-by-sequencing approach  
204 (<https://www.diversityarrays.com/technology-and-resources/targeted-genotyping/>). More  
205 than 2000 single nucleotide polymorphisms (SNP) were used for genotyping. They derived  
206 mostly from SolCAP SNPs based on chromosome positions and MAF > 1 in germplasm  
207 from the Centro Internacional de la Papa (CIP, Lima, Perú) and the USA. According to  
208 Selga et al. (2021), such a number of SNPs seems to be enough for researching GEBVs  
209 without losing information. Although there were very few missing genotyping data (0.1%),  
210 one breeding clone (97) and two cultivars ('Leyla' and 'Red Lady') were not included  
211 further in the analysis because they were lacking enough SNP data.

212

## 213 **2.3 Computing the genomic relationship matrix**

214 We briefly described the method used for codifying the molecular  $X$  matrix proposed by  
215 Slater et al. (2016) and used one of the options used by Ortiz et al. (2022) in the genomic-  
216 enabled prediction models.

217

## 218 **2.4 Full tetrasomic including additive and non-additive effects**

219 For coding matrix  $\mathbf{X}$  according to Slater et al. (2016), we considered additive and non-  
220 additive effects in a full tetrasomic assuming each genotype has its own effect. In this case,  
221 there were five possible effects per SNP marker. Then the genomic relationship between  
222 individuals  $j, k$  was computed as:

$$223 \quad K_{jk} = \frac{\frac{1}{M} \sum_{i=1}^M (x_{ji} - p_i)(x_{ki} - p_i)}{p_i(1-p_i)}$$

224 where  $M$  was the number of markers  $\times 5$ . To compute the diagonal of this matrix, we used:

$$225 \quad K_{jj} = 1 + \frac{\frac{1}{M} \sum_{i=1}^M (x_{ji}^2 - 2p_i x_{ji} + p_i^2)}{p_i(1-p_i)}$$

226 where  $p_i$  was the frequency of each genotype, i.e., the frequency in each column.

227

## 228 **2.5 Statistical models**

### 229 **2.5.1. Single-trait conventional reaction norm model including GE (model 1, MI)**

230 The standard reaction norm model incorporating genomic  $\times$  environment (GE) (Jarquin et  
231 al., 2014), as shown below, explains the variation of the observations of a single trait (ST)  
232 in each of the  $m$  environments (ME) represented by the vector  $\mathbf{y} = (\mathbf{y}'_1, \dots, \mathbf{y}'_i, \dots, \mathbf{y}'_m)'$  by  
233 estimating each mean of the environment observations  $\boldsymbol{\mu}_E$ , plus the prediction of the main  
234 genetic effects  $\mathbf{g}$  and the prediction of the interaction random effects G $\times$ E represented by  
235 vector  $\mathbf{ge}$ , the unexplained differences or random errors are represented by vector  $\boldsymbol{\varepsilon}$ .

$$\mathbf{y} = \mathbf{Z}_E \boldsymbol{\mu}_E + \mathbf{g} + \mathbf{ge} + \boldsymbol{\varepsilon} \quad (1)$$

236 where  $\mathbf{y} = (\mathbf{y}'_1, \dots, \mathbf{y}'_i, \dots, \mathbf{y}'_m)'$  is a column vector of size  $n_T \times 1$  of the observations of  
237 each environment  $\mathbf{y}_i$  (the ' sign indicates the transpose operation), that is,  $n_T \times 1$  is the  
238 total of the sum of the number of lines in each environment. The vector  $\boldsymbol{\mu}_E$  is a vector that  
239 represents the means of the  $m$  environments, and the incidence matrix  $\mathbf{Z}_E$  relates the  
240 observations to the mean of the environments. The random genetic vector of main effects  $\mathbf{g}$   
241 including GE  $n_T \times 1$  follows a multivariate normal distribution  $N(\mathbf{0}, \sigma_g^2 \mathbf{Z}_g \mathbf{K} \mathbf{Z}'_g)$  where  
242  $\sigma_g^2$  is the variance component of  $\mathbf{g}$ ,  $\mathbf{Z}_g$  is an incidence matrix that relates the observations  
243 with the genotypes and  $\mathbf{K}$  is a matrix of relations between the genotypes built with  
244 molecular markers. In our study  $\mathbf{K}$  was computed as previously indicated for the case of a  
245 full tetrasomic genomic relationship matrix. The random vector of interaction effects  $\mathbf{ge}$



246 follows a multivariate normal distribution  $N(\mathbf{0}, \sigma_{ge}^2 \mathbf{Z}_g \mathbf{K} \mathbf{Z}'_g \# \mathbf{Z}_E \mathbf{Z}'_E)$  where  $\sigma_{ge}^2$  is the  
247 variance component and  $\#$  is the Hadamard product. Random errors are considered with  
248 homogeneous variance, that is,  $\boldsymbol{\varepsilon} \sim N(\mathbf{0}, \sigma_{\varepsilon}^2 \mathbf{I})$ . In general, when the correlation between  
249 environments in the training set are positive and high, results from using Hadamard product  
250 to model GE are similar to those obtained using the Kronecker product. This model is  
251 flexible because it allows predicting different numbers of lines in different environments or  
252 even predicting the entire environment. However, when the correlations between the  
253 environments are not positive, the GE model with the Hadamard product does not explain  
254 the phenotype variation well enough (López-Cruz et al., 2015), because the model does not  
255 incorporate covariances between environments.

256

### 257 **2.5.2 Single trait GE (ST-ME) model considering covariances between environments** 258 **(model 2, $M2$ )**

259 Based on Burgueño et al. (2012), the genomic prediction model including GE considered  
260 the genomic covariances between environments to attempt improving the genomic  
261 prediction accuracy of unobserved environments. In  $M2$  we considered only one trait (ST)  
262 and multi environments (ME), but the main effect of genomic and the GE interaction  
263 effects are modeled jointly by using a single vector  $\mathbf{u}$  assuming a multivariate normal  
264 distribution that considers the genomics covariances between environments. One form of  
265 this model is:

$$\mathbf{y} = \mathbf{Z}_E \boldsymbol{\mu}_E + \mathbf{u} + \boldsymbol{\varepsilon} \quad (2)$$

266 where the vectors  $\mathbf{Z}_E \boldsymbol{\mu}_E$  are similar to those of  $M1$ , that is, the  $\boldsymbol{\mu}_E$  is a vector that represents  
267 the means of the  $m$  environments, and the incidence matrix  $\mathbf{Z}_E$  relates the observations with  
268 the mean of the environments, but now the number of cultivars is the same for each  
269 environment so that if we order the phenotypic observations of the first environment, then

270 the second environment and so forth,  $\mathbf{y} = (\mathbf{y}'_1, \dots, \mathbf{y}'_i, \dots, \mathbf{y}'_m)'$  =  $\begin{bmatrix} \mathbf{y}_1 \\ \vdots \\ \mathbf{y}_m \end{bmatrix}$ ; thereafter the

271 genetic random effects can be modeled as a normal distribution  $\mathbf{u} \sim N(\mathbf{0}, \mathbf{U}_E \otimes \mathbf{K})$ , where  $\mathbf{U}_E$   
272 is a matrix of genomic covariances between the environments of size  $m \times m$  to be  
273 estimated, and  $\otimes$  indicates the Kronecker product. The matrix  $\mathbf{K}$  represents the  
274 relationships between the genotypes built with the molecular markers, as previously

275 indicated. The random errors are modeled as  $\boldsymbol{\varepsilon} \sim N(\mathbf{0}, \boldsymbol{\Sigma} \otimes \mathbf{I})$ , where matrix  $\boldsymbol{\Sigma}$  is a matrix of  
276 size  $m \times m$ , expressing the covariances of the errors between environments to be estimated,  
277 and  $\mathbf{I}$  is the identity matrix of order  $n_L \times n_L$  (Cuevas et al., 2017). In this study it is  
278 assumed that  $\boldsymbol{\Sigma}$  is a diagonal matrix that needs to be estimated. Although model  $M2$  is  
279 powerful when considering the genetic covariances between environments, it cannot predict  
280 full environments because it does not have a way of estimating the corresponding genomic  
281 covariances of those environments in the training sites with those in the testing sites where  
282 no data have been collected.

283

### 284 **2.5.3 Single trait GE model (ST-ME) with an extra random vector to better account** 285 **for variance across environments (model 3, $M3$ )**

286 Cuevas et al. (2017) showed that adding a random vector to  $M2$  to account for the cultivar  
287 variation across environments that was accounted for by vector  $\mathbf{u}$ , could increase the  
288 prediction accuracy. Here we considered a single trait (ST) measured in different  
289 environments (ME) to construct and add a random vector  $\mathbf{f}$  to  $M2$ , that is:

$$\mathbf{y} = \mathbf{Z}_E \boldsymbol{\mu}_E + \mathbf{u} + \mathbf{f} + \boldsymbol{\varepsilon} \quad (3)$$

290 Note that  $\mathbf{y}$  is a vector that started with the first environment, then the second environment  
291 and so forth until the last environment. Then  $\mathbf{Z}_E \boldsymbol{\mu}_E$  represents the mean for each  
292 environment and  $\mathbf{u}$  is a random vector with multivariate normal distribution  
293  $\mathbf{u} \sim N(\mathbf{0}, \mathbf{U}_E \otimes \mathbf{K})$ . Then a random vector  $\mathbf{f}$  is added that is independent from  $\mathbf{u}$ , and  $\boldsymbol{\varepsilon}$ , and  
294 that has a normal distribution  $\mathbf{f} \sim N(\mathbf{0}, \mathbf{F}_E \otimes \mathbf{I})$  where  $\mathbf{F}_E$  is a matrix of environmental  
295 covariances of size  $m \times m$  to be estimated,  $\otimes$  indicates the Kronecker product, and matrix  $\mathbf{I}$   
296 represents the identity matrix.

297  $M3$ , like  $M2$ , allows improving the prediction accuracy of model  $M1$ , when the  
298 covariances (or correlations) of the observations between environments are negative or  
299 close to zero. Like  $M2$ ,  $M3$  could not be used to predict complete environments because  
300 technically it could not estimate covariances between related environments with the  
301 environments to be predicted because of the lack of data on the environments to be  
302 predicted.

303  $M2$  and  $M3$  can be used as a multi-trait model for one single site (SE), considering  
304 traits instead of environments. In fact, some of the programs for fitting  $M2$  are motivated by

305 multi-trait models, such as the MTM (multi-trait model) package proposed by de los  
306 Campos and Grueneber (2016), and the multi-trait function of the BGLR R-package (de los  
307 Campos and Pérez Rodríguez, 2014).

308

#### 309 **2.5.4 Multi-trait model with GE (model 4, $M4$ ) of MT-ME type**

310 Note that  $M2$  could be adopted to be a single environment multi-trait (MT-SE) as

$$\mathbf{y} = \mathbf{Z}_T \boldsymbol{\mu}_T + \mathbf{u} + \boldsymbol{\varepsilon}$$

311 where the vectors  $\mathbf{Z}_T \boldsymbol{\mu}_T$  are similar to those of  $M2$ , that is, the  $\boldsymbol{\mu}_T$  is a vector that  
312 represents the means of the  $t$  traits, and the incidence matrix  $\mathbf{Z}_T$  relates the observations  
313 with the mean of the traits, but now the number of cultivars is the same for each trait so that  
314 if we order the phenotypic observations of the first trait, then the second trait and so forth,

315  $\mathbf{y} = (\mathbf{y}'_1, \dots, \mathbf{y}'_i, \dots, \mathbf{y}'_t)'$  =  $\begin{bmatrix} \mathbf{y}_1 \\ \vdots \\ \mathbf{y}_t \end{bmatrix}$ ; then the genetic random effects can be modeled as a

316 normal distribution  $\mathbf{u} \sim N(\mathbf{0}, \mathbf{U}_T \otimes \mathbf{K})$ , where  $\mathbf{U}_T$  is a matrix of genomic covariances  
317 between the traits of size  $t \times t$  to be estimated, and  $\otimes$  indicates the Kronecker product. The  
318 matrix  $\mathbf{K}$  represents the relationships between the genotypes built with the molecular  
319 markers. The random errors are modeled as  $\boldsymbol{\varepsilon} \sim N(\mathbf{0}, \boldsymbol{\Sigma} \otimes \mathbf{I})$ , where matrix  $\boldsymbol{\Sigma}$  is a matrix of  
320 size  $t \times t$ , expressing the covariances of the errors between environments to be estimated;  
321 and  $\mathbf{I}$  is the identity matrix of order  $n_L \times n_L$ . In this study it is assumed that  $\boldsymbol{\Sigma}$  is a diagonal  
322 matrix that needs to be estimated.

323 This model MT-SE can also be represented as a multi-response model, that is,  
324 instead of outlying the observations as a vector, they can be arranged in a matrix so that  $M2$   
325 can be re-written as:

$$\mathbf{Y} = \mathbf{1}_n \boldsymbol{\mu}' + \mathbf{u} + \boldsymbol{\varepsilon} \quad (2a)$$

326 where  $\mathbf{Y}$  is a matrix of order  $n_L \times t$  that represents the phenotypic values ordered in such a  
327 way that the columns contain the data for each trait and the rows contain the data for each  
328 line or genotype. The intercepts or means of each trait are represented by a vector  $\boldsymbol{\mu}$  of size  
329  $t \times 1$ . The matrix of genetic random effects assumes that they follow a multivariate multi-  
330 response normal distribution  $\mathbf{u} \sim MN_{n_L \times t}(\mathbf{0}, \mathbf{K}, \mathbf{U}_T)$ . The random errors assume a  
331 multivariate multi-response normal distribution  $\boldsymbol{\varepsilon} \sim MN_{n_L \times t}(\mathbf{0}, \boldsymbol{\Sigma}, \mathbf{I})$ , where  $\boldsymbol{\Sigma}$  is a matrix of

332 size  $t \times t$  denoting the variances-covariances of the random errors within and between  
333 traits. In this study we assumed that  $\Sigma$  was a diagonal matrix that needs to be estimated.

334 As already mentioned, when multi-trait data are available, the models to be used are  
335 those that account for correlations between phenotypic traits because when the degree of  
336 correlation is moderate or large, this could increase the GP accuracy. The model, based on  
337 the Bayesian multi-trait kernel of Montesinos et al. (2022), can be seen as the combination  
338 of the multi-trait (MT) model 2a and the reaction norm G×E *MI* for multi-environment  
339 (ME). Then *M4* is represented as:

$$340 \quad \mathbf{Y} = \mathbf{1}_{n_T} \boldsymbol{\mu}' + \mathbf{Z}_E \boldsymbol{\mu}_E + \mathbf{g} + \mathbf{g}e + \boldsymbol{\varepsilon} \quad (4)$$

341 where the matrix  $\mathbf{Y}$  is of size  $n_T \times t$  ordered in such a way that the columns represent the  
342 phenotypic values of each of the  $t$  traits and the rows are the lines or genotypes, ordered  
343 first by environments and then by lines. The vector  $\boldsymbol{\mu}$  is of size  $t \times 1$  and it represents the  
344 intercept or mean of each trait. The matrix  $\mathbf{Z}_E$  is an incidence matrix of the environments of  
345 size  $n_T \times m$ , and  $\boldsymbol{\mu}_E$  is a matrix of order  $m \times t$  with the means of each environment in  
346 each trait. The matrix  $\mathbf{g}$  is of order  $n_T \times t$  and follows a normal distribution  
347  $\mathbf{g} \sim MN_{n_T \times t}(\mathbf{0}, \mathbf{Z}_g \mathbf{K} \mathbf{Z}_g', \mathbf{U}_t)$  where  $\mathbf{Z}_g$  is an incidence matrix of the genotypes of order  
348  $n_T \times n_L$ ,  $\mathbf{K}$  is the relationship matrix of the genotypes of size  $n_L \times n_L$  and  $\mathbf{U}_t$  is a  
349 variance-covariance matrix of traits and between the traits. Matrix  $\mathbf{g}e$  is of order  $n_T \times t$   
350 and follows a normal distribution  $\mathbf{g}e \sim MN_{n_T \times t}(\mathbf{0}, \mathbf{Z}_g \mathbf{K} \mathbf{Z}_g' \# \mathbf{Z}_E \mathbf{Z}_E', \mathbf{U}_t)$  where  $\#$  is the  
351 Hadamard product. Random errors are represented by the matrix  $\boldsymbol{\varepsilon}$  of order  $n_T \times t$  that  
352 follows a normal distribution  $\boldsymbol{\varepsilon} \sim MN_{n_T \times t}(\mathbf{0}, \mathbf{I}, \Sigma_t)$  where the identity matrix  $\mathbf{I}$  is of  
353 dimension  $n_T \times n_T$  (for more details, see Montesinos et al., 2021).

354

### 355 **2.5.5 Study different models and cross-validation schemes to assess the accuracy of the** 356 **GP prediction models**

357 The GP accuracy of the different models can be assessed by means of several different  
358 random cross-validation schemes. The first validation scheme (predicts 100% of the  
359 cultivars next year) uses the traits from each of the three locations in 2020 (HEL, MOS, and  
360 UM) to predict all the values of the traits in each three locations in 2021 (HEL, MOS, and  
361 UM). The second validation scheme (predicts 70% next year) uses all the data from 2020  
362 plus 30% of the value of the traits in three locations in 2021 to predict 70% (prediction set)

363 of the value of the traits at the three locations in 2022; this second case was established  
364 with 10 groups or random samples.

365 A graphical explanation of the different combinations of models ( $M1$ – $M4$ ),  
366 considering two prediction sets (100% and 70%), and ST or MT cross-validation schemes  
367 for assessing GP prediction accuracy of the models is shown in **Figure 1** for 10  
368 hypothetical cultivars evaluated in HEL, MOS, and UM in 2020 to predict HEL in 2021.  
369 The training set (TS) is blue in color and the prediction set (PS) is green. The red lines  
370 separate 5 different cross-validation schemes, whereas black lines denote ST prediction,  
371 and no lines denote MT predictions. The only MT model is  $M4$ , whereas ST are models  
372  $M1$ ,  $M2$ , and  $M3$ .

373 As shown in **Figure 1**, the first cross-validations refer to two cases including  
374 models  $M1$  and  $M4$  for predicting all the values (100%) for each trait in location HEL 2021  
375 using as a training set all the values for each trait in each location from 2020. Model  $M1$  is  
376 an ST (traits are separated by black lines), whereas  $M4$  is an MT model (traits are not  
377 separated). For these two cases, the given names join (1) the model, (2) the ST or MT (S or  
378 M) type of prediction, and (3) include the prediction of all (100%) the lines in HEL 2021  
379 and denoted by ‘a’, that is,  $M1Sa$  and  $M4Ma$ . The third and fourth cross-validation schemes  
380 delineated by red lines included models  $M1$ ,  $M2$ ,  $M3$  for ST and model  $M4$  for MT, and  
381 they predict 70% of the values of each trait in HEL 2021 using as training set values of the  
382 trait in each location from 2020 but also adding 30% of the values from HEL 2021 to the  
383 prediction set in the training set. As already mentioned, this prediction of 70% is performed  
384 10 times using the 10 random samples for extracting 30% of the values of the prediction set  
385 (2021) and adding them into training set (2020). The same 10 random samples were used  
386 for comparing the genomic prediction accuracy of the four models. The names of each of  
387 these model-prediction types and sizes are  $M1Sp$ ,  $M2Sp$ ,  $M3Sp$ , and  $M4Mp$  where the letter  
388 ‘p’ refers to the percentage of the prediction set (70%). Note that for these four cases, 3  
389 cultivars (out of 10) are missing in all the traits (**Figure 1**). The fifth cross-validation  
390 scheme had MT  $M4$  that predicts 70% of the cultivars in HEL in 2021 for all traits but now  
391 the cross-validations between the traits and locations for HEL 2021 are different from those  
392 in the previous case ( $M4Mp$ ) where some cultivars are observed in some traits and locations  
393 but not observed in other traits and locations. This cross-validation scheme is referred to

394 *M4Mp*\* Note that in this case, some cultivars are missing in some traits but not in other  
395 traits; for example, cultivars 1, 2, and 3 are not observed for weight of tubers below 40 mm  
396 but are observed for the weight of 40–50 mm tubers (**Figure 1**).

397

### 398 **2.5.6 Measures of prediction accuracy**

399 We used two metrics for comparing the genomic-enabled prediction accuracy of the  
400 different models (*M1*, *M2*, *M3*, and *M4*). One metric is the Pearson correlation coefficient  
401 (COR) between the observed and predicted values, whereas the second metric is the  
402 prediction mean squared error (PMSE) of the different prediction models.

403

404

## 405 **3. RESULTS**

406 Phenotypic correlations were computed for traits in each location (HEL, MOS, and UM) in  
407 2021 (PS) with those traits in the locations of the previous year (HEL, MOS, and UM in  
408 2020) (**Table 1**). The PS contains seven traits (5 tuber weight traits and 2 tuber flesh quality  
409 characteristics) in each of the 3 locations of 2021 using the locations and traits of the  
410 previous year, 2020. The ST or MT prediction models together with the proportion of  
411 cultivars included in the PS are combined in *M1Sa*, *M4Ma*, *M1Sp*, *M2Sp*, *M3Sp*, *M4Mp*,  
412 and *M4Mp*\* (**Tables 2–4** and **Figures 2–4**).

413

### 414 **3.1 Genomic prediction of traits in HEL 2021**

415 Results are presented by location–year combination and predictions included the whole  
416 location in year 2021 (*M1Sa*, and *M4Ma*) and prediction of only 70% of the 2021 location  
417 (*M1Sp*, *M2Sp*, *M3Sp*, *M4Sp*, and *M4Sp*\*). Phenotypic correlations of traits measured in  
418 HEL, MOS, and UM 2020 with all the traits measured in HEL-2021 are given in **Table 1**.  
419 The phenotypic correlations between traits in HEL for 2020 and 2021 are higher than those  
420 between HEL 2021 and other locations in 2020. Tuber flesh starch had the highest  
421 phenotypic correlation between HEL 2021 and HEL, MOS, and UM 2020 (0.89, 0.80, and  
422 0.78, respectively) followed by weight of tubers above 60 mm (0.68, 0.49, and 0.51,

423 respectively), total tuber weight irrespective of size (0.64, 0.48, and 0.39, respectively), and  
424 weight of tubers below 40 mm (0.62, 0.36, and 0.43, respectively).

425 Genomic predictions of whole traits in HEL 2021 from *MISa* and *M4Ma* as well as  
426 from *MISp* to *M4Mp\**, clearly show tuber flesh starch as the best predicted trait for all the  
427 models with genomic prediction accuracy above 0.85 (**Table 2** and **Figure 2**). Most of the  
428 four models shown a very similar genomic prediction accuracy for trait starch ranging from  
429 0.852 (*M2Sp* and *M4Mp*) to 0.877 (*M3Sp*) (**Table 2**, **Figure 2**).

430 The second trait with important GP accuracy shown by most of the models was  
431 tuber weight of 60 mm where *M4Mp\** had the highest prediction accuracy (0.730, **Table 2**)  
432 and *MISa* had the lowest genomic prediction accuracy (0.627). Weight of tubers below 40  
433 mm and total tuber weight had very similar genomic prediction accuracy except for model  
434 *M4Mp\** which was the worst model for weight of tubers below 40 mm but the best model  
435 for trait total tuber weight. Excluding *M4Mp\**, the predictions ranged from 0.525 (<40 mm,  
436 *M4Ma*) to 0.623 (<40mm *M3Sp*) for both traits. The best predictive model was *M3Sp* for  
437 weight of tubers below 40 mm and *MISa* for total tuber weight (**Figure 2**). Weight of  
438 tubers with 40–50 mm and 50–60 mm sizes had the lowest prediction accuracy for most  
439 models except *M3Sp* (**Figure 2**). Comparing models with ST and MT, *M3Sp* was the best  
440 ST model for 3 traits (tuber weight below 40mm and between 50–60mm, and tuber flesh  
441 starch) and *M4Mp\** was best for the other 3 traits (40–50mm, >60mm, and total tuber  
442 weight).

443 In summary, prediction of the seven traits at HEL in 2021 shows that traits with  
444 higher phenotypic correlation between location HEL 2021 and those at HEL, MOS, and  
445 UM in 2020 are tuber flesh starch and most of the tuber weights (except weight of tubers  
446 50–60 mm). In terms of GP accuracy, multi-trait model *M4Mp\** was the best in weight of  
447 tubers 40–50mm or above 60 mm size, and total tuber weight, being very similar to those  
448 for tuber flesh starch. Model *M3Sp* was the best GP for tuber weights <40mm and 50–  
449 60mm, as well as tuber flesh starch.

450

### 451 **3.2 Genomic prediction of traits in MOS 2021**

452 Phenotypic correlation of traits measured in location MOS in 2020–2021 are given in  
453 **Table 1**. For all the traits the phenotypic correlations between traits in MOS for 2021 and

454 2020 are higher than those between MOS 2021 and the two other locations (HEL and UM)  
455 in 2020. Tuber flesh starch had the highest phenotypic correlation between MOS 2021 and  
456 HEL, MOS, and UM 2020 (0.83, 0.89, and 0.72, respectively) followed by weight of tubers  
457 above 60 mm (0.73, 0.74, and 0.62, respectively), total tuber weight (0.64, 0.74, and 0.52,  
458 respectively), and weight of tubers below 40 mm (0.65, 0.64, and 0.55, respectively).

459 Overall genomic predictions accuracy in MOS 2021 was higher than in HEL 2021.  
460 Tuber flesh starch was the best predicted trait for all the models with < 0.85 genomic  
461 prediction accuracy (**Table 3** and **Figure 3**). Most of the four models showed a very similar  
462 genomic prediction accuracy for tuber flesh starch but *M2Sp* and *M3Sp* were the best  
463 genomic predictors, with 0.866 and 0.867, respectively. *MISa* and *M4Ma* were slightly  
464 below in terms of prediction accuracy (0.847 and 0.848, respectively).

465 The second trait with important genomic prediction accuracy shown by most of the  
466 models was tuber weight above 60 mm with *M4Mp\** with an accuracy of 0.817, followed  
467 by *MISa* having an accuracy of 0.791 followed by *M3Sp* with 0.790 (**Table 3**). Overall,  
468 total tuber weight irrespective of size ranked third based on genomic prediction accuracy,  
469 with model *M4Mp\** having a prediction accuracy of 0.808, followed by *M3Sp* with 0.758  
470 prediction accuracy followed by *M2Sp* (0.750). Weight of tubers below 40mm had  
471 relatively high genomic prediction accuracy, with models *M2Sp* and *M3Sp* being the best  
472 with 0.717 and 0.714 of genomic prediction accuracy, respectively. Finally, weight of  
473 tubers 50–60 mm in size had lower prediction accuracy than the previously mentioned  
474 traits, with the best predictor models being *M4Mp\** with 0.711 GP accuracy, followed by  
475 *M2Sp* and *M3Sp* with 0.660 accuracy.

476 The GP accuracy of the seven traits in location MOS in 2021 showed slightly higher  
477 accuracy in the prediction of the seven traits in 2021 than those found for the traits at HEL  
478 2021. Results show that the traits with higher phenotypic correlation between MOS 2021  
479 and those at HEL, MOS, and UM in 2020 are tuber flesh starch, weight of tubers above 60  
480 mm and below 40 mm, total tuber weight, and weight of tubers with 50–60mm. In general,  
481 the best models for predicting the majority of the seven traits were *M3Sp* and *M2Sp*, except  
482 for traits such as weight of tubers with 50–60mm and above 60 mm, and total tuber weight  
483 in which MT model *M4Mp\** was the best GP model.

484



### 485 3.3 Genomic prediction of traits in location UM 2021

486 **Table 1** lists the phenotypic correlation of traits measured at UM in 2020–2021. For all the  
487 traits, the phenotypic correlations between traits in UM for 2021 and 2020 are higher than  
488 those between UM 2021 and other locations (HEL and MOS) in 2020. The traits with the  
489 highest phenotypic correlation between UM 2021 and HEL, MOS and UM 2020 were  
490 weight of tubers with 50–60mm, below 40 mm, and above 60 mm, followed by tuber flesh  
491 starch.

492 Overall genomic prediction accuracy in UM 2021 was lower than those found at  
493 HEL and MOS in 2021. Weight of tuber with 50–60 mm and below 40 mm were the best  
494 predicted traits for all the models in UM 2021 (**Table 4** and **Figure 4**). The best GP model  
495 for all the traits, except reducing sugars and starch in the tuber flesh, was *M4Mp\**. Models  
496 *M3Sp* and *M4Mp* had the best GP accuracy for predicting traits tuber flesh sugar and starch,  
497 respectively.

498 Most of the four models showed similar genomic prediction accuracy for these two  
499 traits, but *M2Sp* had a genomic prediction accuracy of 0.688 for tuber weight with  
500 50–60mm and model *M4Mp* had an accuracy of 0.633 for weight of tubers below 40 mm.  
501 Models *M2Sp* and *M3Sp* had a genomic prediction accuracy of around 0.578 for weight of  
502 tubers above 60 mm that ranked third on overall genomic prediction accuracy (**Table 4**)  
503 followed by tuber flesh starch, with model *M3Sp* being the best with 0.483 prediction  
504 accuracy, followed by *M2Sp* (0.481).

505 The genomic prediction accuracy of the seven traits at UM in 2021 showed lower  
506 accuracy in 2021 than at HEL and MOS in 2021. Traits with higher phenotypic correlations  
507 between UM 2021 and those at HEL, MOS, and UM in 2020 are weight of tubers with  
508 50–60mm, below 40 mm, and above 60 mm. However, the best model for predicting the  
509 majority of the seven traits was *M4Mp\**, followed by models *M4Mp* for tuber flesh starch  
510 and *M3Sp* for tuber flesh sugar.

511

## 512 4. DISCUSSION

513 The integration of GS and GP to develop modern cultivars faster than the  
514 conventional breeding method is necessary for increasing genetic gains and facing the

515 changes in climate that are currently affecting agriculture. Thus, a better and efficient  
516 integration of new methods including GS with increased GP accuracy, rapid cycle GS, high  
517 throughput phenotyping, and the use of appropriate environmental covariables is an urgent  
518 area of research (Crossa et al., 2021). The integration and exploitation of several big data  
519 sets is necessary, and the use of appropriate statistical machine learning models has become  
520 important for modern breeding.

521

#### 522 **4.1 Prediction accuracy of model for ST and MT, cross-validation method and** 523 **proportion of the prediction set**

524 When performing research on GS and GP accuracy, several problems become  
525 important; one is the inclusion of statistical machine learning methods and models that  
526 include GE interaction. Another problem to be assessed is the addition of several traits for  
527 prediction rather than only one trait, and another issue is the methods used for comparing  
528 the GP accuracy of several traits using several models and various possible cross-validation  
529 schemes to develop a GP accuracy metric. Several options exist for investigating the GS  
530 accuracy for predicting the breeding value of cultivars that have been genotyped with  
531 genome-wide molecular markers. One scenario is predicting the performance of a  
532 proportion of cultivars (e.g., 70%) that have not yet been observed in any of the testing  
533 environments (usually location-year combinations); another option is to predict all cultivars  
534 (i.e., 100%) observed in all the environments except one (leave one environment out).  
535 Another scenario is predicting cultivars that were observed in some environments but not in  
536 others.

537 In this study predictions for these scenarios have been done using single-trait (ST)  
538 (*M1*, *M2* and *M3*) and multi-trait (MT) (*M4*) models. These ST and MT models combined  
539 with different PT scenarios are represented in **Figure 1**, where several proportions of the  
540 PS have been combined with the four different models. We included the predictions of all  
541 cultivars in one entire site-year combination or the prediction of a proportion of cultivar  
542 (70%) using the other 30% as TS together with the previous year. We found that for the  
543 majority of the traits in each location-year combination to be predicted (HEL, MOS, UM in  
544 2021) *M4* (multi-trait), with a proportion of potato cultivars evaluated (30%) in some  
545 location-year combinations *M4Mp\** (**Figure 1**) but not observed in other location-year

546 combinations, was found to be the best predictive model usually followed by ST models  
547 *M3Sp* and *M2Sp*.

548 Results of this study demonstrate that for predicting traits in HEL 2021 using all  
549 environments in 2020 the superiority of the MT prediction method *M4Mp\** over the mean  
550 GP accuracy of the other six prediction methods including ST and MT for predicting entire  
551 PS (100%) or 70% for traits tuber weights 40–50mm, above 60mm and total in location  
552 were 65%, 14% and 24%, respectively. However, this superiority of the MT over ST  
553 methods was not so when comparing *M4Ma* or *M4Mp* with other ST methods, especially  
554 for *M3Sp* for traits tuber weight < 40mm, 50–60mm and tuber flesh starch. Results for  
555 predicting traits in location MOS in 2021 using all environments in 2020 show the  
556 superiority of MT prediction method *M4Mp\** for four tuber weight traits and one tuber  
557 flesh quality characteristic over all the other six methods. The GP accuracy of method  
558 *M4Mp\** overcame the mean GP accuracy of all the other six methods by 10%, 9%, 4%, 8%  
559 and 4% for traits tuber weights 40–50mm, 50–60mm, above 60mm, total and tuber flesh  
560 sugar, respectively. Similar results were obtained for the prediction of location UM in 2021  
561 using the TS comprising HEL, MOS, and UM from 2020; the best GP accuracy method for  
562 all five tuber weight traits was method *M4Mp\** over the mean GP accuracy of all the other  
563 six methods by 7%, 24%, 12%, 8% and 26% for tuber weights below 40 mm, 40–50 mm,  
564 50–60 mm, above 60 mm and total tuber weight, respectively.

565 Previous research noticed variable prediction accuracy that depends on factors such  
566 as heritability of the trait, size of TP, relatedness of PS and TS, statistical machine learning  
567 models, marker density, linkage disequilibrium, and the incorporation of GE interactions in  
568 the prediction models. In a recent article, Semagn et al. (2022) compared the predictive  
569 abilities of wheat cultivars that have not been evaluated for a single trait (ST), not evaluated  
570 for multi-traits (MT1), and evaluated for some traits but not others (MT2) using agronomy  
571 and disease traits. Note that the partition of Semagn’s MT1 is similar to the partitions of *Sp*  
572 (*M1*, *M2*, and *M3*) and *Mp* (*M4*) in this study, whereas the partitions of Semagn’s MT2 is  
573 similar to that of *M4Mp\**. Semagn et al. (2022) found that the GP accuracy of MT2  
574 (method *M4Mp\** in this study) increased over ST and other model-partitions in all traits  
575 from 9% to 82%. This occurred because under the prediction scheme MT2 of Semagn et al.  
576 (2022) it is possible exchange of information between traits like method *M4Mp\** that

577 allows borrowing of information between traits and also between environments and thus  
578 efficiently use the available information in one single model combined with an appropriate  
579 prediction scheme.

580 This demonstrated the high potential for improving prediction accuracies and the  
581 high potential of the MT models for improving prediction accuracy, thus offering  
582 researchers the opportunity to predict traits that were not observed, due to possible  
583 difficulties or because they are expensive to measure under certain environmental  
584 constraints (Semagn et al., 2022).

585

#### 586 **4.2 Prediction accuracy of potato traits**

587 Genomic prediction in potato is still in the early research stages before using it for  
588 routine breeding of this highly heterozygous tetrasomic polyploid tuberous crop with  
589 vegetative propagation (Ortiz et al., 2022, and references therein). The use of MT and ME  
590 models for genomic prediction in this research led to highest accuracy for tuber yield and  
591 tuber flesh starch as per available literature. Tuber flesh starch, which is often estimated  
592 from specific gravity measurements, is a very highly heritable trait (Bradshaw, 2021, Ortiz  
593 et al., 2021) that is affected very little by the genotype  $\times$  environment interactions (Killick  
594 and Simmonds, 1974), thus explaining the high prediction accuracy noted in this and  
595 research elsewhere. The high prediction accuracy noted in this, and previous research  
596 suggest that developing GEBV modeling in potato for tuber flesh starch does not require a  
597 very large training population but just a few hundred (including both breeding clones and  
598 released cultivars that are relevant to the breeding program and covering a broad range of  
599 trait variation) may suffice.

600 Genotype  $\times$  environment interactions may significantly affect tuber yield, but the  
601 use of multi-environment genomic prediction allows identifying promising germplasm in  
602 both crossing blocks (Ortiz et al., 2022) in potato breeding. The significantly high  
603 correlations noted when using multi-trait, multi-environment modeling suggest that  
604 genomic prediction may also be useful for the potato cultivar development pipeline even  
605 when using small breeding populations (Selga et al., 2022). Every year F<sub>1</sub> seeds (resulting  
606 from crossing heterozygous parents) are planted in individual pots in a greenhouse, and one  
607 tuber (the best in size) for each plant is taken at harvest. Thus, thousands of tubers derived

608 from these F<sub>1</sub> hybrid seeds are produced for further field testing in single plant plots during  
609 the first year. At harvest, all plants are dug up to assess their tuber number, size, shape,  
610 color, appearance, and health, which are used as the selection criteria for obtaining the next  
611 breeding generation for further testing the next year. After selection in early clonal  
612 generations (first [T<sub>1</sub>], second [T<sub>2</sub>] and often third [T<sub>3</sub>]), the aim is to have about a few  
613 dozens for field-testing from the fourth generation onwards and ending with a few  
614 promising breeding clones after the 7<sup>th</sup> year of field-testing and selection to include them in  
615 multi-site trials in the target population of environments. The genomic prediction accuracy  
616 over the two years within each site suggests that it will be possible to select (based on  
617 GEBV models) in early generation trials for each target population of environments.  
618 Furthermore, as per previous GP accuracy estimates (Ortiz et al., 2022; Selga et al., 2022)  
619 and these results, it seems that GEBV for selection will be useful from T<sub>3</sub> onwards rather  
620 than in T<sub>1</sub> or even in T<sub>2</sub>. Hence, as shown herein, genomic selection appears to be feasible  
621 in potato breeding when using elite bred germplasm.

622

## 623 **5. CONCLUSION**

624 We investigated the accuracy of four genome-based prediction models including  
625 either Hadamard or Kronecker product matrices for assessing GE. Several prediction  
626 problems were analyzed for the GP accuracy of each of the four models. We investigated  
627 the prediction set of locations in year 2021 from locations in year 2020 using the four GP  
628 models combined with two prediction sets (100% and 70%) using both ST and MT. The ST  
629 model *M3Sp* was the best genomic predicted, followed by *MISp* and *MISa* at HEL in 2021.  
630 In terms of MT GP accuracy, *M4Mp*\* was the best for weight of tubers with 40–50mm,  
631 above 60 mm and total tuber weight irrespective of size, and very similar to tuber flesh  
632 starch. The GP accuracy of the seven traits at MOS in 2021 indicated that the best models  
633 for predicting the majority of the seven traits were ST *M3Sp* and *M2Sp*, except for weight  
634 of tubers with 50–60mm, above 60mm, and total tuber weight, where MT model *M4Mp*\*  
635 was the best GP model. The traits with higher phenotypic correlations between location  
636 UM 2021 and those at HEL, MOS, and UM in 2020 are weight of tubers with 50–60 mm,  
637 below 40 mm, and above 60 mm. The best model-method for predicting the majority of the  
638 seven traits was MT *M4Mp*\* because it allows exchange information between traits and

639 environments followed by *M3Sp* and *M2Sp* that efficiently used information between  
640 environments. According with Cuevas et al (2017) it was expected *M3Sp* producing better  
641 or similar GP accuracy than *M2Sp*.

642

643

## 644 **6. DATA AVAILABILITY STATEMENT**

645 DNA marker and phenotypic data for each year within sites are stored at

646 <https://hdl.handle.net/11529/10548784>

647

## 648 **7. FUNDING**

649 The authors are grateful for grant and other funding provided by the Swedish University of  
650 Agricultural Sciences (SLU) and the Swedish Research Council Formas to the project  
651 (2019– 2022) “Genomisk prediktion i kombination med högkapacitetsfenotypning för att  
652 öka potatisens knölskörd i ett föränderligt klimat”.

653

## 654 **8. CONFLICT OF INTEREST**

655 The authors declare that the research was conducted in the absence of any commercial or  
656 financial relationships that could be construed as a potential conflict of interest.

657

## 658 **9. AUTHOR CONTRIBUTIONS**

659 RO conceptualized the research, and together with JCr and FR did the experimental designs  
660 for all trials. FR and RO carried out evaluations and data recording. JCu, JCr and RO did  
661 the analysis and interpretation of the research results. All authors wrote the manuscript  
662 under the leadership of JCr.

663

## 664 **10. REFERENCES**

665 Acosta-Pech R, Crossa J, de los Campos G, et al. (2017). Genomic models with genotype ×  
666 environment interaction for predicting hybrid performance: An application in maize

- 667 hybrids. *Theoretical and Applied Genetics* 130, 1431–1440. DOI: 10.1007/s00122-017-  
668 2898-0
- 669 Basnet BR, Crossa J, Dreisigacker S, et al. (2019). Hybrid wheat prediction using genomic,  
670 pedigree, and environmental covariables interaction models. *The Plant Genome* 12,  
671 30951082. DOI: 10.3835/plantgenome2018.07.0051
- 672 Bradshaw, J.E. (2021). *Potato Breeding: Theory and Practice*. Springer Nature, Cham,  
673 Switzerland. DOI: 10.1007/978-3-030-64414-7\_1
- 674 Burgueño J, Crossa J, Cornelius PL, et al. (2007). Modeling additive  $\times$  environment and  
675 additive  $\times$  additive  $\times$  environment using genetic covariances of relatives of wheat  
676 genotypes. *Crop Science* 47, 311–320. DOI: 10.2135/cropsci2006.09.0564
- 677 Burgueño J, de los Campos G, Weigel K, Crossa J (2012). Genomic prediction of breeding  
678 values when modeling genotype  $\times$  environment interaction using pedigree and dense  
679 molecular markers. *Crop Science* 52, 707–719. DOI: 10.2135/cropsci2011.06.0299
- 680 Calus MP, Veerkamp RF (2011). Accuracy of multi-trait genomic selection using different  
681 methods. *Genetic Selection Evolution* 43, 26. DOI: 10.1186/1297-9686-43-26.
- 682 Crossa J, De Los Campos G, Pérez P, et al. (2010). Prediction of genetic values of  
683 quantitative traits in plant breeding using pedigree and molecular markers. *Genetics* 186,  
684 713–724. DOI: 10.1534/genetics.110.118521
- 685 Crossa J, Pérez P, de los Campos G, Mahuku G, et al. (2011). Genomic selection and  
686 prediction in plant breeding. *Journal of Crop Improvement* 25, 239–261. DOI:  
687 10.1080/15427528.2011.558767
- 688 Crossa J, Pérez P, Hickey J, et al. (2014). Genomic prediction in CIMMYT maize and  
689 wheat breeding programs. *Heredity* 112, 48–60.
- 690 Crossa J, Pérez-Rodríguez P, Cuevas J, et al. (2017). Genomic selection in plant breeding:  
691 methods, models, and perspectives. *Trends in Plant Science* 22, 961–975. DOI:  
692 10.1016/j.tplants.2017.08.011
- 693 Crossa J, Fritsche-Neto R, Montesinos-Lopez OA, et al. (2021). The modern plant breeding  
694 triangle: optimizing the use of genomics, phenomics, and enviromics data. *Frontiers in*  
695 *Plant Science* 12, 651480. DOI: 10.3389/fpls.2021.651480

- 696 Cuevas J, Crossa J, Soberanis V, et al. (2016). Genomic prediction of genotype ×  
697 environment interaction kernel regression models. *The Plant Genome* 9. DOI:  
698 10.3835/plantgenome2016.03.0024.
- 699 Cuevas J, Couto EGO, Pérez-Rodríguez P, et al. (2017). Genomic-enabled prediction in  
700 maize using kernel models with genotype × environment interaction. *G3: Genes,*  
701 *Genomes, Genetics* 7, 1995–2014. DOI: 10.1534/g3.117.042341
- 702 de los Campos G, Naya H, Gianola D, et al. (2009). Predicting quantitative traits with  
703 regression models for dense molecular markers and pedigree. *Genetics* 182, 375–385.  
704 DOI: 10.1534/genetics.109.101501
- 705 de los Campos G, Gianola D, Rosa GJ, et al. (2010). Semi-parametric genomic-enabled  
706 prediction of genetic values using reproducing kernel Hilbert spaces methods. *Genetic*  
707 *Research (Cambridge)* 92, 295–308. DOI: 10.1017/S0016672310000285
- 708 de los Campos G, Grüneberg A (2016). MTM (Multiple-Trait Model) package. Available  
709 at: <http://quantgen.github.io/MTM/vignette.html>. Accessed 3<sup>rd</sup> July 2022.
- 710 Desta ZA, Ortiz R (2014) Genomic selection: genomic prediction in plant improvement.  
711 *Trends in Plant Science* 19, 592-601. DOI: 10.1016/j.tplants.2014.05.006
- 712 Endelman JB (2011). Ridge regression and other kernels for genomic selection with R  
713 Package rrBLUP. *The Plant Genome* 4, 250–255. DOI:  
714 10.3835/plantgenome2011.08.0024
- 715 Gianola D, Fernando RL, Stella A (2006). Genomic-assisted prediction of genetic value  
716 with semiparametric procedures. *Genetics* 173, 1761–1776.  
717 DOI: 10.1534/genetics.105.049510
- 718 Gianola D, Van Kaam JBCHM (2008). Reproducing kernel Hilbert spaces regression  
719 methods for genomic assisted prediction of quantitative traits. *Genetics* 178, 2289–2303.  
720 DOI: 10.1534/genetics.107.084285
- 721 Gianola D, Weigel KA, Krämer N, et al. (2014). Enhancing genome-enabled prediction by  
722 bagging genomic BLUP. *PLoS One* 9, e91693. DOI: 10.1371/journal.pone.0091693
- 723 González-Camacho JM, de los Campos G, Pérez-Rodríguez P, et al. (2012). Genome-  
724 enabled prediction of genetic values using radial basis function neural networks.  
725 *Theoretical and Applied Genetics* 125, 759–771. DOI: 10.1007/s00122-012-1868-9



- 726 He D, Kuhn D, Parida L (2016). Novel applications of multitask learning and multiple  
727 output regression to multiple genetic trait prediction. *Bioinformatics* 32, i37–i43. DOI:  
728 10.1093/bioinformatics/btw249
- 729 Jarquín D, Crossa J, Lacaze X, et al. (2014). A reaction norm model for genomic selection  
730 using high-dimensional genomic and environmental data. *Theoretical and Applied*  
731 *Genetics* 127, 595–607. DOI: 10.1007/s00122-013-2243-1
- 732 Jiang Y, Reif JC (2015). Modeling epistasis in genomic selection. *Genetics* 201, 759–768.  
733 DOI: 10.1534/genetics.115.177907
- 734 Jiang Y, Jannink J-L (2012). Multiple-trait genomic selection methods increase genetic  
735 value prediction accuracy. *Genetics* 192, 1513–1522. DOI: 10.1534/genetics.112.144246.
- 736 Killick RJ, Simmonds NW (1974). Specific gravity of potato tubers as a character showing  
737 small genotype-environment interactions. *Heredity* 32, 109–112.  
738 DOI:10.1038/hdy.1974.10
- 739 Lopez-Cruz M, Crossa J, Bonnett D, et al. (2015). Increased prediction accuracy in wheat  
740 breeding trials using a marker  $\times$  environment interaction genomic selection model. *G3:*  
741 *Genes, Genomes, Genetics* 5:569–582. DOI: 10.1534/g3.114.016097
- 742 Mann DJ, Lammerink JP, Coles GD (1991). Predicting potato crisp darkening: two  
743 methods for analysis of glucose. *New Zealand Journal of Crop and Horticultural Science*  
744 19, 199–201. DOI: 10.1080/01140671.1991.10421799
- 745 Martini JWR, Wimmer V, Erbe M., Simianer H (2016). Epistasis and covariance: How  
746 gene interaction translates into genomic relationship. *Theoretical and Applied Genetics*,  
747 129, 963–976. DOI:10.1007/s00122-016-2675-5
- 748 Martini JWR, Toledo FH, Crossa J (2020). On the approximation of interaction effect  
749 models by Hadamard powers of the additive genomic relationship. *Theoretical*  
750 *Population Biology* 132, 16–23 DOI: 10.1016/j.tpb.2020.01.004
- 751 Meuwissen THE, Hayes BJ, Goddard ME (2001). Prediction of total genetic value using  
752 genome-wide dense marker maps. *Genetics* 157, 1819–1829.  
753 DOI:10.1093/genetics/157.4.1819
- 754 Montesinos-López A, Montesinos-López OA, Crossa J, et al. (2016). Genomic Bayesian  
755 prediction model for count data with genotype  $\times$  environment interaction. *G3: Genes,*  
756 *Genomes, Genetics* 6, 1165–1177. DOI: 10.1534/g3.116.028118.

- 757 Montesinos-López A, Montesinos-López OA, Gianola D, et al. (2018). Multi-environment  
758 genomic prediction of plant traits using deep learners with a dense architecture. *G3:*  
759 *Genes, Genomes, Genetics* 8, 3813–3828. DOI:10.1534/g3.118.200740.
- 760 Montesinos-López OA, Martín-Vallejo J, Crossa J, et al. (2019). New deep learning  
761 genomic-based prediction model for multiple traits with binary, ordinal, and continuous  
762 phenotypes. *G3: Genes, Genomes, Genetics* 9, 1545–1556. DOI: 10.1534/g3.119.300585
- 763 Montesinos-López OA, Montesinos-López JC, Montesinos-López A, et al. (2022).  
764 Bayesian multitrait kernel methods improve multi-environment genome-based  
765 prediction. *G3: Genes, Genomes, Genetics* 12, jkab406. DOI: 10.1093/g3journa  
766 l/jkab406
- 767 Ortiz R, Crossa J, Reslow F, et al. (2022). Genome-based genotype × environment  
768 prediction enhances potato (*Solanum tuberosum* L.) improvement using pseudo-diploid  
769 and polysomic tetraploid modeling. *Frontiers in Plant Sciences* 13, 785196. DOI:  
770 10.3389/fpls.2022.785196
- 771 Ortiz R, Reslow F, Crossa J, Cuevas J (2021). Heritable variation, genetic and phenotypic  
772 correlations for tuber traits and host plant resistance to late blight for potato breeding in  
773 Scandinavian testing sites. *Agriculture* 11, 1287. DOI: 10.3390/agriculture11121287
- 774 Ortiz R, Selga C, Reslow F, Carlson-Nilsson U (2020). Svensk potatisförädling: Breeding  
775 the new table and crisp potatoes. *Sveriges Utsädesförenings Tidskrift* 1–2020, 16–26
- 776 Pérez-Elizalde S, Cuevas J, Pérez-Rodríguez P, Crossa J (2015). Selection of the  
777 Bandwidth Parameter in a Bayesian Kernel Regression Model for Genomic-Enabled  
778 Prediction. *Journal of Agricultural, Biological and Environmental Statistics* 20, 512–532.  
779 DOI: 10.1007/s13253-015-0229-y
- 780 Pérez-Rodríguez P, Gianola D, González-Camacho JM, et al. (2012). Comparison between  
781 linear and non-parametric regression models for genome-enabled prediction in wheat. *G3:*  
782 *Genes, Genomes, Genetics* 2, 1595–1605. DOI: 10.1534/g3.112.003665
- 783 Perez-Rodriguez P, Crossa J, Rutkoski J, et al. (2017). Single-step genomic and pedigree  
784 genotype × environment interaction models for predicting wheat lines in international  
785 environments. *The Plant Genome* 10. DOI: 10.3835/plantgenome2016.09.0089
- 786 Pérez-Rodríguez P, de los Campos G (2014). Genome-wide regression and prediction with  
787 the BGLR statistical package. *Genetics* 198, 483–495. DOI: 10.1534/genetics.114.164442

- 788 Schulthess AW, Zhao Y, Longin CFH, Reif JC. (2018). Advantages and limitations of  
789 multiple-trait genomic prediction for *Fusarium* head blight severity in hybrid wheat.  
790 *Theoretical and Applied Genetics* 131, 685–701. DOI: 10.1007/s00122-017-3029-7
- 791 Semagn K, Crossa J, Cuevas J et al. (2022). Comparison of single-trait and multi-trait  
792 genomic predictions on agronomic and disease resistance traits in spring wheat.  
793 *Theoretical and Applied Genetics* 135, 2747–2767. DOI: 10.1007/s00122-022-04147-3
- 794 Selga C, Koc A, Chawade, A, Ortiz R (2021). A bioinformatics pipeline to identify a subset  
795 of SNPs for genomics-assisted potato breeding. *Plants* 10, 30. DOI:  
796 10.3390/plants10010030
- 797 Selga C, Reslow F, Pérez-Rodríguez P, Ortiz R (2022). The power of genomic estimated  
798 breeding value for selection when using a finite population size in genetic improvement of  
799 tetraploid potato. *G3: Genes, Genomes, Genetics* 12, jkab362. DOI: 10.1093/  
800 g3journal/jkab362
- 801 Slater A, Cogan NOI, Forster JW, et al. (2016). Improving genetic gain with genomic  
802 selection in autotetraploid potato. *The Plant Genome* 9, lantgenome2016.02.0021. DOI:  
803 10.3835/plantgenome2016.02.0021
- 804 Sousa, MB, Cuevas J, Couto EGO, Pérez-Rodríguez P, Jarquín D, et al. (2017). Genomic-  
805 enabled prediction in maize using kernel models with genotype · environment interaction.  
806 *G3: Genes, Genomes, Genetics* 7, 1995–2014. DOI: 10.1534/g3.117.042341.
- 807 Sukumaran S, Crossa J, Jarquín J, et al. (2017). Genomic prediction with pedigree and  
808 genotype × environment interaction in spring wheat grown in South and West Asia, North  
809 Africa, and Mexico. *G3: Genes, Genomes, Genetics* 7, 481–495.
- 810 VanRaden PM. (2008). Efficient methods to compute genomic predictions. *Journal of*  
811 *Dairy Science* 91, 4414–4423. DOI:10.3168/jds.2007-0980
- 812 Varona L, Legarra A, Toro MA, Vitezica ZG (2018). Non-additive effects in genomic  
813 selection. *Frontiers in Genetics* 9, 78. DOI: 10.3389/fgene.2018.00078
- 814 Vitezica ZG, Legarra A, Toro MA, Varona L (2017). Orthogonal estimates of variances for  
815 additive, dominance, and epistatic effects in populations. *Genetics* 206, 1297–1307.



**Table 1.** Phenotypic correlations of each trait at Helgegården (HEL) in 2021 with each trait at HEL 2020, Mosslunda (MOS) 2020, and Umeå (UM) 2020. Phenotypic correlations of each trait oat MOS 2021 with each trait at HEL 2020, MOS 2020, and UM2020. Phenotypic correlations of each trait at UM 2021 with each trait at HEL 2020, MOS 2020, UM 2020.

| Site_year | Traits           |          |          |        |       |             |       |
|-----------|------------------|----------|----------|--------|-------|-------------|-------|
|           | Weight of tubers |          |          |        |       | Tuber flesh |       |
|           | <40 mm           | 40–50 mm | 50–60 mm | > 60mm | Total | Starch      | Sugar |
| HEL 2021  |                  |          |          |        |       |             |       |
| HEL 2020  | 0.62             | 0.60     | 0.24     | 0.68   | 0.64  | 0.89        | 0.36  |
| MOS 2020  | 0.36             | 0.20     | -0.16    | 0.49   | 0.48  | 0.80        | 0.30  |
| UM 2020   | 0.43             | -0.05    | -0.25    | 0.51   | 0.39  | 0.78        | 0.43  |
| MOS 2021  |                  |          |          |        |       |             |       |
| HEL 2020  | 0.65             | 0.49     | 0.56     | 0.73   | 0.64  | 0.83        | 0.39  |
| MOS 2020  | 0.64             | 0.50     | 0.61     | 0.74   | 0.74  | 0.89        | 0.36  |
| UM 2020   | 0.55             | 0.28     | 0.45     | 0.62   | 0.52  | 0.72        | 0.41  |
| UM 2021   |                  |          |          |        |       |             |       |
| HEL 2020  | 0.49             | 0.04     | 0.42     | 0.53   | 0.38  | 0.48        | 0.31  |
| MOS 2020  | 0.49             | 0.30     | 0.47     | 0.40   | 0.29  | 0.40        | 0.33  |
| UM 2020   | 0.57             | 0.51     | 0.67     | 0.57   | 0.46  | 0.46        | 0.46  |

825

826

827

828

829

830

831

**Table 2.** Predictive correlations (COR) and predictive mean squared error (PMSE) for predicting seven traits at Helgegården (HEL) in 2021 for four models (*M1*, *M2*, *M3*, *M4*) combined with 100% or 70% cross-validation. *MISa* is the prediction accuracy from model *M1* (single trait conventional reaction norm model incorporating genomic  $\times$  environment interaction [GE]) when predicting 100% of each trait in 2021; *M4Ma* is the prediction accuracy from model *M4* (multi-trait model with GE) when predicting 100% of each trait in 2021; *MISp* is the prediction accuracy from model *M1* when predicting 70% of each trait in 2021; *M2Sp* is the prediction accuracy from model *M2* (single trait GE model considering covariances between environments) when predicting 70% of each trait in 2021; *M3Sp* is the prediction accuracy from model *M3* (single trait GE *M2* extended to include a random vector that more efficiently utilizes the environmental covariances) when predicting 70% of each trait in 2021; *M4Mp* is the prediction accuracy from model *M4* when predicting 70% of each trait in 2021, *M4Mp\** is the prediction accuracy from model *M4* when predicting 70% of each trait in 2021 in which some cultivars are observed in some traits. When predicting 70%, the mean and the standard deviations (sd) from the 10-fold cross-validation are given in parentheses.

| Model name  | Prediction accuracy measures | Traits 2021  |         |         |        |        |             |       |
|-------------|------------------------------|--------------|---------|---------|--------|--------|-------------|-------|
|             |                              | Tuber weight |         |         |        |        | Tuber flesh |       |
|             |                              | < 40mm       | 40-50mm | 50-60mm | >60mm  | Total  | Starch      | Sugar |
| <i>MISa</i> | COR                          | 0.539        | 0.269   | -0.097  | 0.627  | 0.551  | 0.868       | 0.511 |
|             | PMSE                         | 0.552        | 1.630   | 6.271   | 17.040 | 12.020 | 1.601       | 0.730 |
| <i>M4Ma</i> | COR                          | 0.525        | 0.292   | -0.111  | 0.628  | 0.533  | 0.867       | 0.493 |
|             | PMSE                         | 0.388        | 1.702   | 5.049   | 16.940 | 12.600 | 1.640       | 0.804 |
| <i>MISp</i> | COR(mean)                    | 0.576        | 0.244   | -0.127  | 0.632  | 0.537  | 0.868       | 0.508 |

|              |            |       |       |        |        |        |       |       |
|--------------|------------|-------|-------|--------|--------|--------|-------|-------|
|              | COR (sd)   | 0.043 | 0.043 | 0.038  | 0.028  | 0.031  | 0.010 | 0.031 |
|              | PMSE(mean) | 0.143 | 0.975 | 4.785  | 16.300 | 11.878 | 1.582 | 0.799 |
|              | PMSE(sd)   | 0.022 | 0.058 | 0.570  | 0.708  | 0.677  | 0.088 | 0.035 |
| <i>M2Sp</i>  | COR(mean)  | 0.549 | 0.370 | -0.065 | 0.637  | 0.533  | 0.852 | 0.466 |
|              | COR (sd)   | 0.060 | 0.045 | 0.051  | 0.029  | 0.039  | 0.016 | 0.048 |
|              | PMSE(mean) | 0.226 | 1.433 | 5.615  | 16.732 | 11.948 | 1.620 | 0.799 |
|              | PMSE(sd)   | 0.028 | 0.086 | 0.676  | 0.730  | 0.677  | 0.185 | 0.038 |
| <i>M3Sp</i>  | COR(mean)  | 0.623 | 0.508 | 0.424  | 0.651  | 0.548  | 0.877 | 0.508 |
|              | COR (sd)   | 0.046 | 0.041 | 0.042  | 0.039  | 0.039  | 0.012 | 0.040 |
|              | PMSE(mean) | 0.076 | 0.716 | 3.112  | 13.460 | 11.812 | 1.459 | 0.746 |
|              | PMSE(sd)   | 0.012 | 0.061 | 0.345  | 1.346  | 1.146  | 0.106 | 0.054 |
| <i>M4Mp</i>  | COR(mean)  | 0.549 | 0.370 | -0.057 | 0.636  | 0.533  | 0.852 | 0.467 |
|              | COR (sd)   | 0.058 | 0.047 | 0.052  | 0.023  | 0.034  | 0.018 | 0.047 |
|              | PMSE(mean) | 0.142 | 0.863 | 4.317  | 16.833 | 12.242 | 1.650 | 0.810 |
|              | PMSE(sd)   | 0.020 | 0.060 | 0.614  | 0.701  | 0.644  | 0.103 | 0.036 |
| <i>M4Mp*</i> | COR(mean)  | 0.484 | 0.562 | 0.191  | 0.730  | 0.658  | 0.866 | 0.502 |
|              | COR (sd)   | 0.044 | 0.050 | 0.077  | 0.029  | 0.021  | 0.016 | 0.037 |
|              | PMSE(mean) | 0.154 | 0.684 | 3.858  | 12.279 | 10.000 | 1.607 | 0.796 |
|              | PMSE(sd)   | 0.014 | 0.125 | 0.411  | 1.084  | 0.760  | 0.125 | 0.048 |

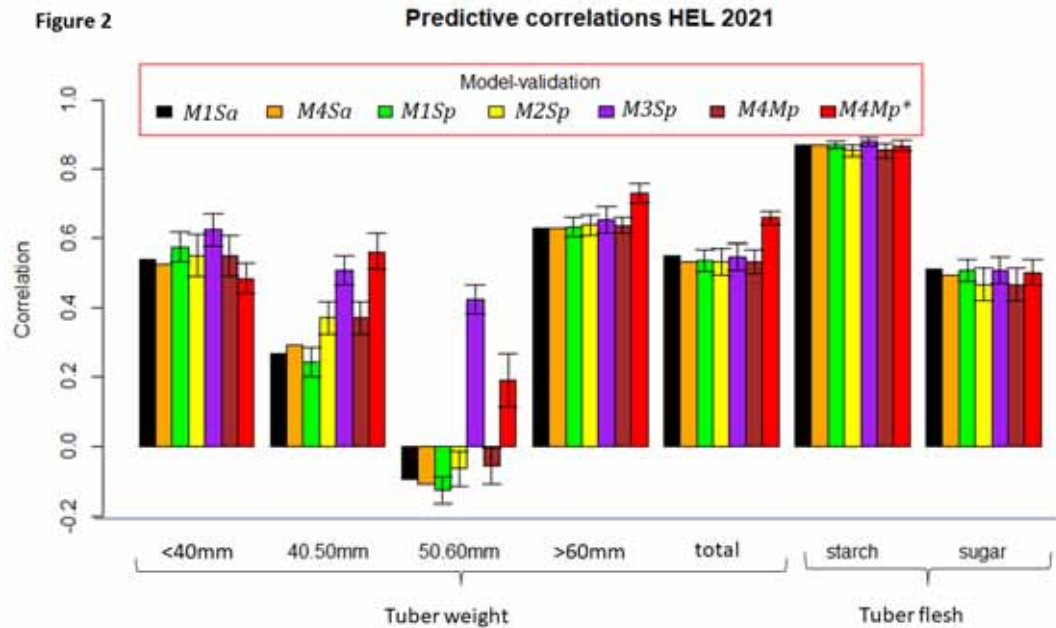

833

834 **Figure 2.** Trait prediction in 2021 at Hellegården (HEL). *M1Sa* is the prediction accuracy  
835 from model *M1* (single trait conventional reaction norm model incorporating genomic ×  
836 environment interaction [GE]) when predicting 100% of each trait in 2021). *M4Ma* is the  
837 prediction accuracy from model *M4* (multi-trait model with GE) when predicting 100% of  
838 each trait in 2021. *M1Sp* is the prediction accuracy from model *M1* when predicting 70% of  
839 each trait in 2021. *M2Sp* is the prediction accuracy from model *M1* when predicting 70% of  
840 each trait in 2021. *M3Sp* is the prediction accuracy from model *M1* when predicting 70% of  
841 each trait in 2021. *M4Mp* is the prediction accuracy from model *M4* when predicting 70%  
842 of each trait in 2021. *M4Mp\** is the prediction accuracy from model *M4* when predicting  
843 70% of each trait in 2021 in which some cultivars are observed in some traits.



**Table 3.** Predictive correlations (COR) and predictive mean squared error (PMSE) for predicting seven traits at Mosslunda (MOS) in 2021 for four models (*M1*, *M2*, *M3*, *M4*) combined with 100% or 70% cross-validation. *M1Sa* is the prediction accuracy from model *M1* (single trait conventional reaction norm model incorporating genomic  $\times$  environment interaction [GE]) when predicting 100% of each trait in 2021. *M4Ma* is the prediction accuracy from model *M4* (multi-trait model with GE like) when predicting 100% of each trait in 2021. *M1Sp* is the prediction accuracy from model *M1* when predicting 70% of each trait in 2021. *M2Sp* is the prediction accuracy from model *M2* (single trait GE model considering covariances between environments) when predicting 70% of each trait in 2021. *M3Sp* is the prediction accuracy from model *M3* (single trait GE *M2* extended to include a random vector that more efficiently utilizes the environmental covariances) when predicting 70% of each trait in 2021; *M4Mp* is the prediction accuracy from model *M4* when predicting 70% of each trait in 2021, *M4Mp\** is the prediction accuracy from model *M4* when predicting 70% of each trait in 2021 in which some cultivars are observed in some traits. When predicting 70%, the mean and the standard deviations (sd) are given from the 10-fold cross-validation in parentheses.

| Model name  | Prediction accuracy measures | Traits 2021  |         |         |       |       |             |       |
|-------------|------------------------------|--------------|---------|---------|-------|-------|-------------|-------|
|             |                              | Tuber weight |         |         |       |       | Tuber flesh |       |
|             |                              | <40mm        | 40–50mm | 50–60mm | >60mm | Total | Starch      | Sugar |
| <i>M1Sa</i> | COR                          | 0.694        | 0.550   | 0.647   | 0.791 | 0.739 | 0.847       | 0.572 |
|             | PMSE                         | 0.112        | 0.587   | 0.949   | 1.600 | 3.700 | 2.050       | 0.890 |
| <i>M4Ma</i> | COR                          | 0.680        | 0.551   | 0.641   | 0.779 | 0.734 | 0.848       | 0.550 |
|             | PMSE                         | 0.256        | 0.595   | 1.420   | 0.940 | 3.756 | 2.100       | 0.840 |
| <i>M1Sp</i> | COR(mean)                    | 0.693        | 0.564   | 0.648   | 0.786 | 0.749 | 0.851       | 0.578 |

|              |            |       |       |       |       |       |       |       |
|--------------|------------|-------|-------|-------|-------|-------|-------|-------|
|              | COR (sd)   | 0.032 | 0.025 | 0.028 | 0.018 | 0.016 | 0.028 | 0.034 |
|              | PMSE(mean) | 0.113 | 0.583 | 0.949 | 1.599 | 3.400 | 1.991 | 0.877 |
|              | PMSE(sd)   | 0.010 | 0.034 | 0.100 | 0.123 | 0.165 | 0.251 | 0.040 |
| <i>M2Sp</i>  | COR(mean)  | 0.717 | 0.564 | 0.660 | 0.777 | 0.750 | 0.866 | 0.556 |
|              | COR (sd)   | 0.029 | 0.038 | 0.029 | 0.026 | 0.018 | 0.024 | 0.026 |
|              | PMSE(mean) | 0.075 | 0.591 | 0.919 | 1.701 | 3.459 | 1.777 | 0.807 |
|              | PMSE(sd)   | 0.006 | 0.044 | 0.097 | 0.164 | 0.264 | 0.222 | 0.063 |
| <i>M3Sp</i>  | COR(mean)  | 0.714 | 0.557 | 0.660 | 0.790 | 0.758 | 0.867 | 0.553 |
|              | COR (sd)   | 0.029 | 0.037 | 0.030 | 0.023 | 0.018 | 0.026 | 0.025 |
|              | PMSE(mean) | 0.075 | 0.595 | 0.920 | 1.605 | 3.335 | 1.757 | 0.817 |
|              | PMSE(sd)   | 0.005 | 0.042 | 0.095 | 0.145 | 0.221 | 0.234 | 0.058 |
| <i>M4Mp</i>  | COR(mean)  | 0.710 | 0.580 | 0.640 | 0.776 | 0.732 | 0.851 | 0.546 |
|              | COR (sd)   | 0.026 | 0.027 | 0.033 | 0.019 | 0.027 | 0.021 | 0.032 |
|              | PMSE(mean) | 0.077 | 0.578 | 1.023 | 1.804 | 3.405 | 2.345 | 0.904 |
|              | PMSE(sd)   | 0.004 | 0.066 | 0.048 | 0.131 | 0.232 | 0.166 | 0.037 |
| <i>M4Mp*</i> | COR(mean)  | 0.684 | 0.622 | 0.711 | 0.817 | 0.808 | 0.856 | 0.579 |
|              | COR (sd)   | 0.029 | 0.036 | 0.014 | 0.016 | 0.020 | 0.017 | 0.028 |
|              | PMSE(mean) | 0.105 | 0.546 | 0.804 | 1.410 | 2.782 | 1.890 | 0.881 |
|              | PMSE(sd)   | 0.004 | 0.066 | 0.048 | 0.131 | 0.232 | 0.166 | 0.037 |

Figure 3

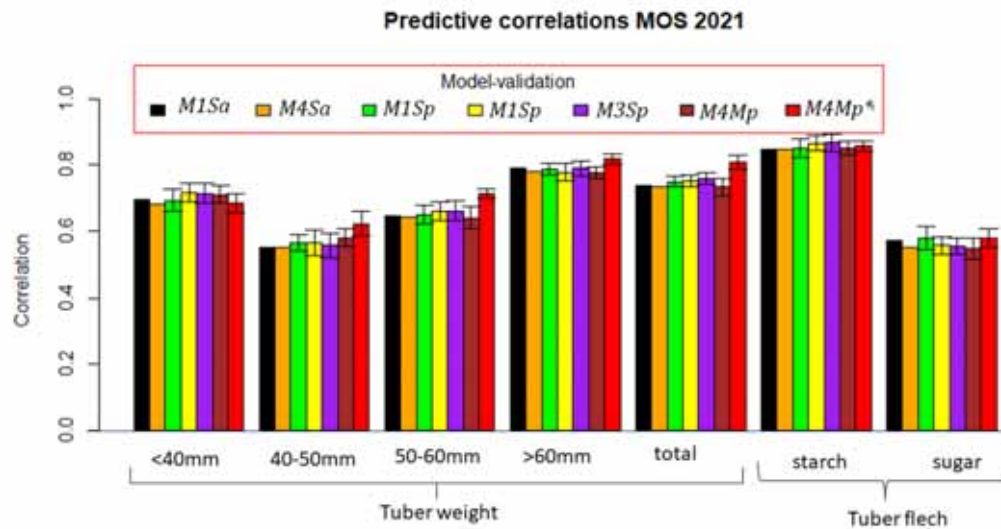

846

847

848

849

850

851

852

853

854

855

856

857

**Figure 3.** Trait prediction in 2021 at Mosslunda (MOS). *M1Sa* is the prediction accuracy from model *MI* (single trait conventional reaction norm model incorporating genomic  $\times$  environment interaction [GE]) when predicting 100% of each trait in 2021. *M4Ma* is the prediction accuracy from model *M4* (multi-trait model with GE) when predicting 100% of each trait in 2021. *M1Sp* is the prediction accuracy from model *MI* when predicting 70% of each trait in 2021. *M2Sp* is the prediction accuracy from model *MI* when predicting 70% of each trait in 2021. *M3Sp* is the prediction accuracy from model *MI* when predicting 70% of each trait in 2021. *M4Mp* is the prediction accuracy from model *M4* when predicting 70% of each trait in 2021. *M4Mp\** is the prediction accuracy from model *M4* when predicting 70% of each trait in 2021 in which some cultivars are observed in some traits.

**Table 4.** Predictive correlations (COR) and predictive mean squared error (PMSE) for predicting seven traits at UM in 2021 for four models (*M1*, *M2*, *M3*, *M4*) combined with 100% or 70% cross-validation. *M1Sa* is the prediction accuracy from model *M1* (single trait conventional reaction norm model incorporating genomic  $\times$  environment interaction [GE]) when predicting 100% of each trait in 2021. *M4Ma* is the prediction accuracy from model *M4* (multi-trait model with GE) when predicting 100% of each trait in 2021. *M1Sp* is the prediction accuracy from model *M1* when predicting 70% of each trait in 2021. *M2Sp* is the prediction accuracy from model *M2* (single trait GE model considering covariances between environments) when predicting 70% of each trait in 2021. *M3Sp* is the prediction accuracy from model *M3* (single trait GE *M2* extended to include a random vector that more efficiently utilizes the environmental covariances) when predicting 70% of each trait in 2021. *M4Mp* is the prediction accuracy from model *M4* when predicting 70% of each trait in 2021, *M4Mp\** is the prediction accuracy from model *M4* when predicting 70% of each when some cultivars are observed in some traits. When predicting 70% the mean and the standard deviations (sd) from the 10-fold cross-validation are given in parentheses.

| Model name  | Prediction accuracy measures | Traits 2021  |         |         |       |             |        |       |
|-------------|------------------------------|--------------|---------|---------|-------|-------------|--------|-------|
|             |                              | Tuber weight |         |         |       | Tuber flesh |        |       |
|             |                              | <40mm        | 40–50mm | 50–60mm | >60mm | Total       | Starch | Sugar |
| <i>M1Sa</i> | COR                          | 0.626        | 0.425   | 0.625   | 0.527 | 0.411       | 0.479  | 0.529 |
|             | PMSE                         | 0.540        | 1.127   | 0.925   | 0.715 | 6.680       | 6.220  | 0.817 |
| <i>M4Ma</i> | COR                          | 0.617        | 0.400   | 0.641   | 0.563 | 0.446       | 0.488  | 0.515 |
|             | PMSE                         | 0.544        | 1.220   | 0.885   | 0.703 | 5.742       | 5.860  | 0.824 |
| <i>M1Sp</i> | COR(mean)                    | 0.633        | 0.445   | 0.629   | 0.534 | 0.404       | 0.487  | 0.545 |

|              |            |       |       |       |       |       |       |       |
|--------------|------------|-------|-------|-------|-------|-------|-------|-------|
|              | COR (sd)   | 0.034 | 0.034 | 0.031 | 0.024 | 0.033 | 0.021 | 0.027 |
|              | PMSE(mean) | 0.537 | 1.125 | 0.922 | 0.674 | 6.909 | 6.128 | 0.802 |
|              | PMSE(sd)   | 0.052 | 0.071 | 0.088 | 0.106 | 0.600 | 0.554 | 0.049 |
| <i>M2Sp</i>  | COR(mean)  | 0.605 | 0.502 | 0.688 | 0.578 | 0.450 | 0.481 | 0.544 |
|              | COR (sd)   | 0.025 | 0.025 | 0.025 | 0.032 | 0.031 | 0.036 | 0.032 |
|              | PMSE(mean) | 0.556 | 1.054 | 0.796 | 0.674 | 5.705 | 5.896 | 0.744 |
|              | PMSE(sd)   | 0.080 | 0.078 | 0.067 | 0.054 | 0.352 | 0.459 | 0.054 |
| <i>M3Sp</i>  | COR(mean)  | 0.605 | 0.512 | 0.682 | 0.581 | 0.463 | 0.483 | 0.550 |
|              | COR (sd)   | 0.024 | 0.019 | 0.024 | 0.031 | 0.022 | 0.029 | 0.034 |
|              | PMSE(mean) | 0.557 | 1.042 | 0.809 | 0.671 | 5.581 | 5.879 | 0.741 |
|              | PMSE(sd)   | 0.082 | 0.064 | 0.070 | 0.056 | 0.398 | 0.457 | 0.053 |
| <i>M4Mp</i>  | COR(mean)  | 0.627 | 0.451 | 0.663 | 0.573 | 0.449 | 0.496 | 0.537 |
|              | COR (sd)   | 0.035 | 0.043 | 0.028 | 0.029 | 0.035 | 0.025 | 0.020 |
|              | PMSE(mean) | 0.535 | 1.137 | 0.875 | 1.257 | 6.375 | 5.982 | 0.792 |
|              | PMSE(sd)   | 0.056 | 0.098 | 0.088 | 0.119 | 0.646 | 0.555 | 0.063 |
| <i>M4Mp*</i> | COR(mean)  | 0.662 | 0.558 | 0.732 | 0.603 | 0.551 | 0.482 | 0.519 |
|              | COR (sd)   | 0.020 | 0.033 | 0.012 | 0.030 | 0.036 | 0.044 | 0.019 |
|              | PMSE(mean) | 0.428 | 0.949 | 0.710 | 1.064 | 5.324 | 5.854 | 0.851 |
|              | PMSE(sd)   | 0.027 | 0.065 | 0.035 | 0.084 | 0.533 | 0.371 | 0.077 |

Figure 4

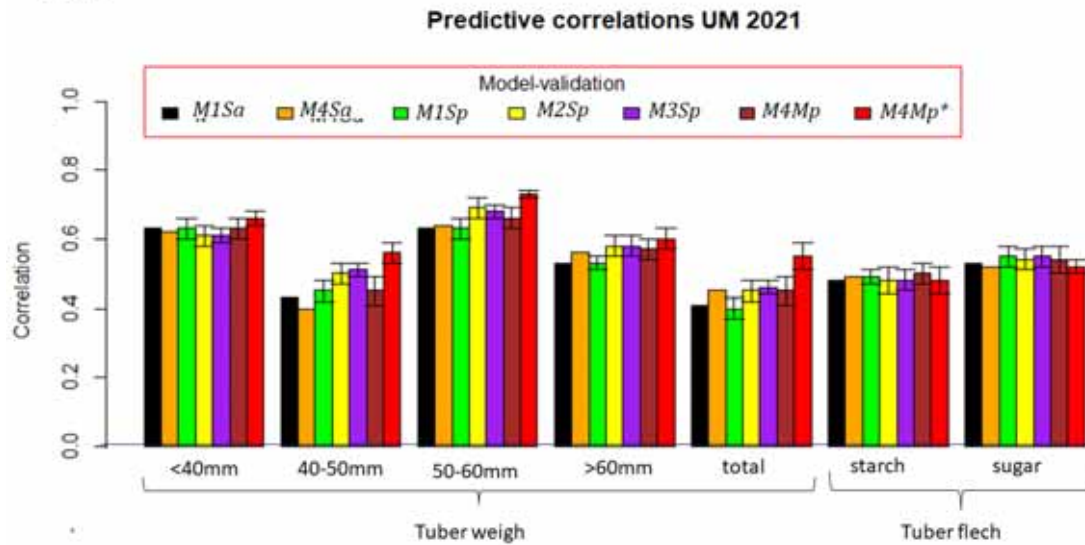

860

861

862

863

864

865

866

867

868

869

870

871

**Figure 4.** Trait prediction in 2021 at Umeå (UM). *M1Sa* is the prediction accuracy from model *MI* (single trait conventional reaction norm model incorporating genomic  $\times$  environment interaction [GE]) when predicting 100% of each trait in 2021. *M4Ma* is the prediction accuracy from model *M4* (multi-trait model with GE) when predicting 100% of each trait in 2021. *M1Sp* is the prediction accuracy from model *MI* when predicting 70% of each trait in 2021. *M2Sp* is the prediction accuracy from model *MI* when predicting 70% of each trait in 2021. *M3Sp* is the prediction accuracy from model *MI* when predicting 70% of each trait in 2021. *M4Mp* is the prediction accuracy from model *M4* when predicting 70% of each trait in 2021. *M4Mp\** is the prediction accuracy from model *M4* when predicting 70% of each trait in 2021 in which some cultivars are observed in some traits

Example: Prediction scheme for one site (HEL\_2021)

| Model                                                                               | Prediction type and size   | Model name | Traits        | Training set |           |           | Prediction set |
|-------------------------------------------------------------------------------------|----------------------------|------------|---------------|--------------|-----------|-----------|----------------|
|                                                                                     |                            |            |               | HEL 2020     | MOS 2020  | UM 2020   | HEL2021        |
| M1<br>$y = Z_{\varepsilon} \mu_{\varepsilon} + g + ge + \varepsilon$                | Single trait - 100% (a)=Sa | M1Sa       | 40mm          | * * * * *    | * * * * * | * * * * * | * * * * *      |
|                                                                                     |                            |            | 40.50mm       | * * * * *    | * * * * * | * * * * * | * * * * *      |
|                                                                                     |                            |            | 50.60mm       | * * * * *    | * * * * * | * * * * * | * * * * *      |
|                                                                                     |                            |            | 60mm          | * * * * *    | * * * * * | * * * * * | * * * * *      |
|                                                                                     |                            |            | tfract.weight | * * * * *    | * * * * * | * * * * * | * * * * *      |
|                                                                                     |                            |            | sugar         | * * * * *    | * * * * * | * * * * * | * * * * *      |
| M4<br>$Y = 1_{n_T} \mu' + Z_{\varepsilon} \mu_{\varepsilon} + g + ge + \varepsilon$ | Multi trait - 100% (a)=Ma  | M4Ma       | 40mm          | * * * * *    | * * * * * | * * * * * | * * * * *      |
|                                                                                     |                            |            | 40.50mm       | * * * * *    | * * * * * | * * * * * | * * * * *      |
|                                                                                     |                            |            | 50.60mm       | * * * * *    | * * * * * | * * * * * | * * * * *      |
|                                                                                     |                            |            | 60mm          | * * * * *    | * * * * * | * * * * * | * * * * *      |
|                                                                                     |                            |            | tfract.weight | * * * * *    | * * * * * | * * * * * | * * * * *      |
|                                                                                     |                            |            | sugar         | * * * * *    | * * * * * | * * * * * | * * * * *      |
| M1<br>$y = Z_{\varepsilon} \mu_{\varepsilon} + g + ge + \varepsilon$                | Single trait - 70% (p)=Sp  | M1Sp       | 40mm          | * * * * *    | * * * * * | * * * * * | * * * * *      |
| M2<br>$y = Z_{\varepsilon} \mu_{\varepsilon} + u + \varepsilon$                     |                            | M2Sp       | 40.50mm       | * * * * *    | * * * * * | * * * * * | * * * * *      |
| M3<br>$y = Z_{\varepsilon} \mu_{\varepsilon} + u + f + \varepsilon$                 |                            | M3Sp       | 50.60mm       | * * * * *    | * * * * * | * * * * * | * * * * *      |
|                                                                                     |                            |            | 60mm          | * * * * *    | * * * * * | * * * * * | * * * * *      |
|                                                                                     |                            |            | tfract.weight | * * * * *    | * * * * * | * * * * * | * * * * *      |
| M4<br>$Y = 1_{n_T} \mu' + Z_{\varepsilon} \mu_{\varepsilon} + g + ge + \varepsilon$ | Multi trait - 70% (p)=Mp   | M4Mp       | 40mm          | * * * * *    | * * * * * | * * * * * | * * * * *      |
|                                                                                     |                            |            | 40.50mm       | * * * * *    | * * * * * | * * * * * | * * * * *      |
|                                                                                     |                            |            | 50.60mm       | * * * * *    | * * * * * | * * * * * | * * * * *      |
|                                                                                     |                            |            | 60mm          | * * * * *    | * * * * * | * * * * * | * * * * *      |
|                                                                                     |                            |            | tfract.weight | * * * * *    | * * * * * | * * * * * | * * * * *      |
|                                                                                     |                            |            | sugar         | * * * * *    | * * * * * | * * * * * | * * * * *      |
| M4<br>$Y = 1_{n_T} \mu' + Z_{\varepsilon} \mu_{\varepsilon} + g + ge + \varepsilon$ | Multi trait - 70% (p*)=Mp* | M4Mp*      | 40mm          | * * * * *    | * * * * * | * * * * * | * * * * *      |
|                                                                                     |                            |            | 40.50mm       | * * * * *    | * * * * * | * * * * * | * * * * *      |
|                                                                                     |                            |            | 50.60mm       | * * * * *    | * * * * * | * * * * * | * * * * *      |
|                                                                                     |                            |            | 60mm          | * * * * *    | * * * * * | * * * * * | * * * * *      |
|                                                                                     |                            |            | tfract.weight | * * * * *    | * * * * * | * * * * * | * * * * *      |
|                                                                                     |                            |            | sugar         | * * * * *    | * * * * * | * * * * * | * * * * *      |

Figure 2

Predictive correlations HEL 2021

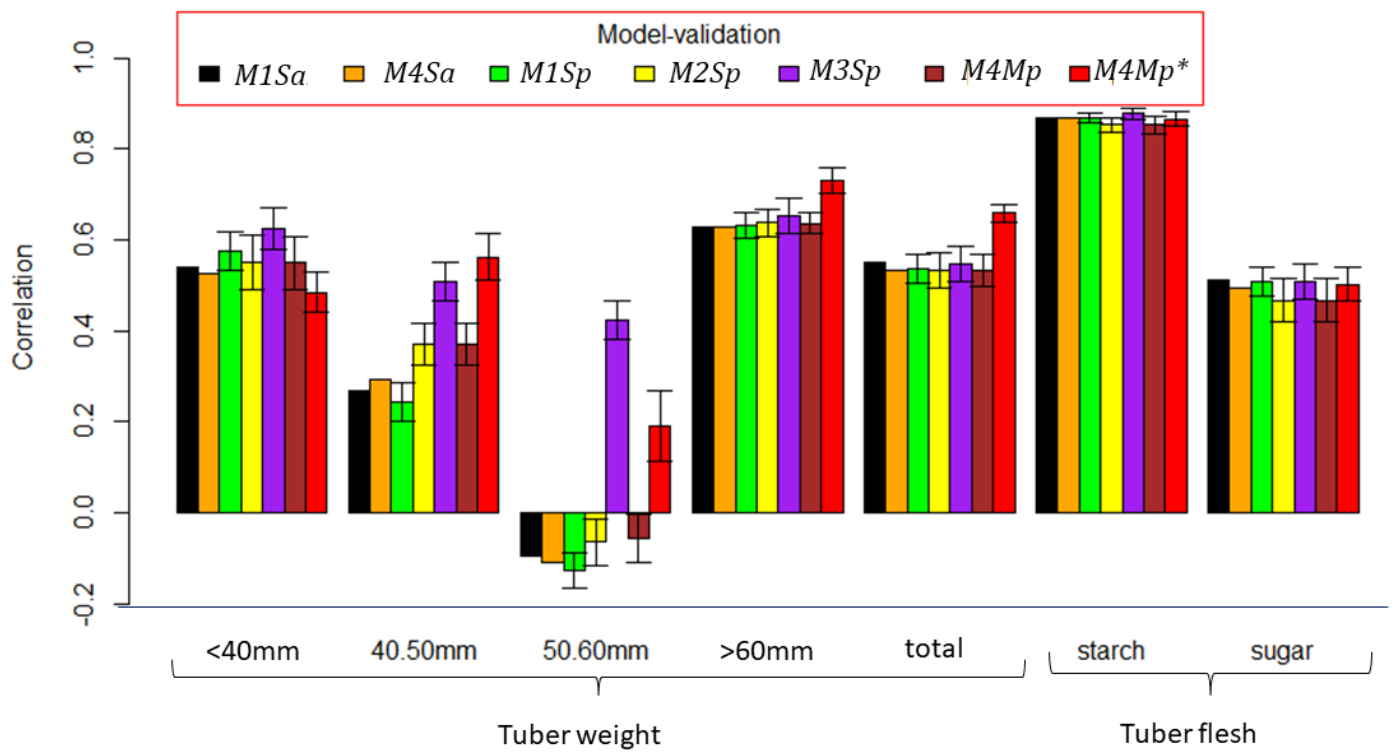



Figure 3

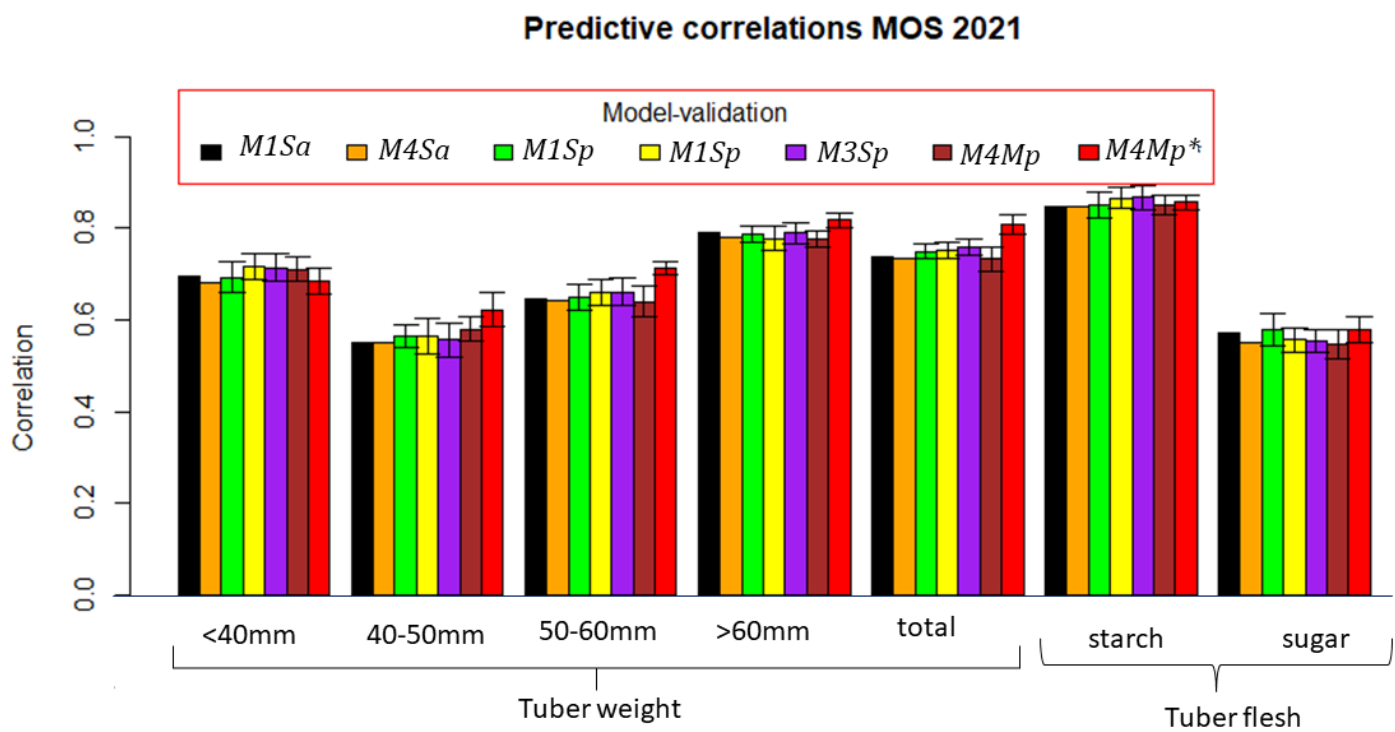

Figure 4

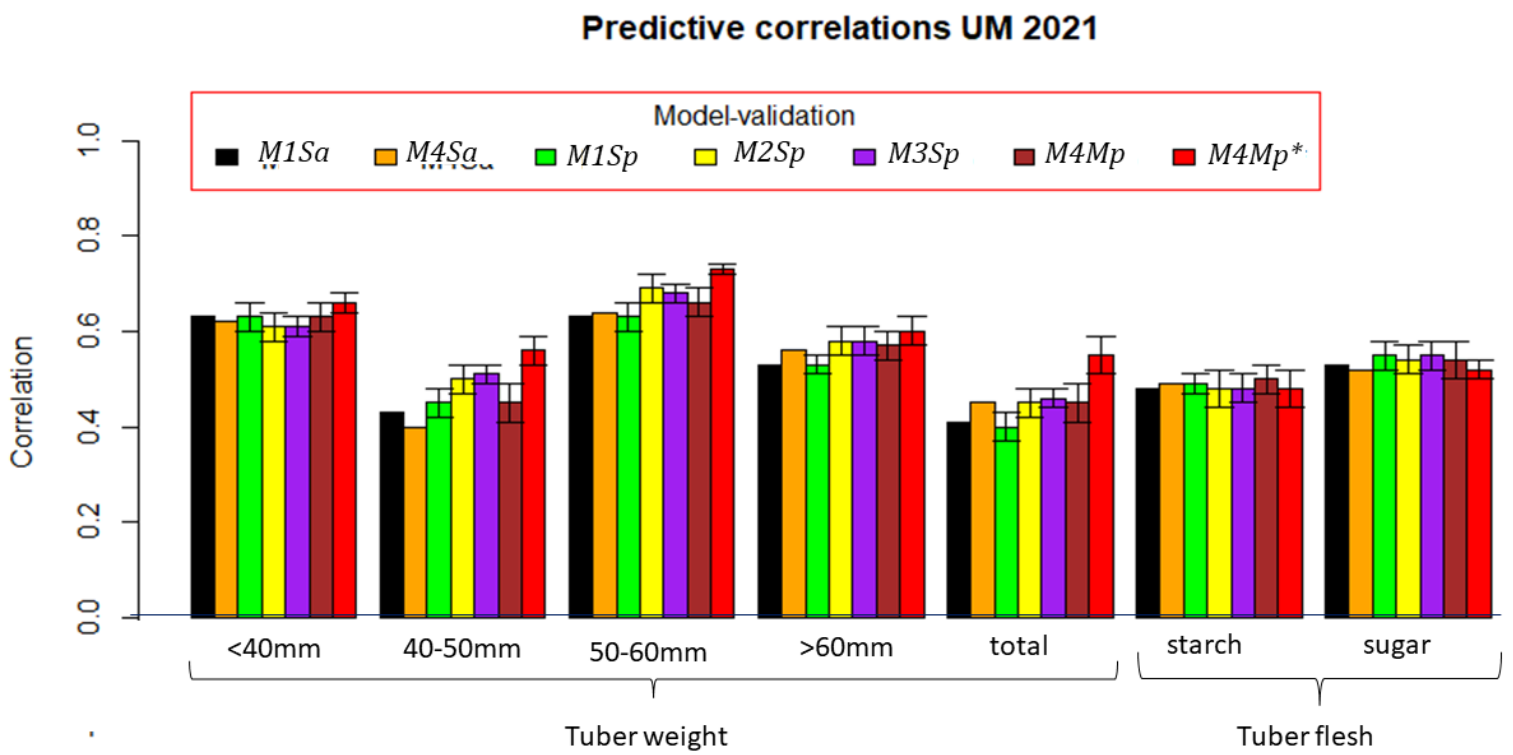

Source: http://biorxiv.org/content/10.1101/2022.08.09.503418v1.full.pdf
